# Supplementary material for: Antiviral activity of sulphated specialized metabolites from sea urchin Clypeaster humilis : in vitro and in silico studies
Source: Royal Society of Chemistry journal article supplement (doi:10.1039/d4ra01966k), 2024-01-01
Supplement: d4ra01966k1.pdf [file d4ra01966k1.pdf]

**Antiviral Activity of Sulphated Specialized Metabolites from Sea Urchin *Clypeaster humilis*: *in vitro* and *in silico* studies**

Fahd M. Abdelkarem<sup>a</sup>, Hamdy K. Assaf<sup>a</sup>, Yaser A. Mostafa<sup>b,c</sup>, Aldoushy Mahdy<sup>d</sup>, Modather F. Hussein<sup>e,f</sup>, Samir A. Ross<sup>g,h</sup>, Nesma M. Mohamed<sup>i,j\*</sup>

<sup>a</sup>Department of Pharmacognosy, Faculty of Pharmacy, Al-Azhar University, Assiut 71524, Egypt.

<sup>b</sup>Pharmaceutical Organic Chemistry Department, Faculty of Pharmacy, Assiut University, Assiut 71526, Egypt.

<sup>c</sup>Pharmaceutical Chemistry Department, Faculty of Pharmacy, Badr University in Assiut, Assiut 77771, Egypt.

<sup>d</sup>Department of Zoology, Faculty of Science, Al-Azhar University, Assiut, 71524, Egypt.

<sup>e</sup>Chemistry Department, Collage of Science, Jouf University, P.O. Box 2014, Sakaka 72388, Saudi Arabia.

<sup>f</sup>Chemistry Department, Faculty of Science, Al-Azhar University, Asyut Branch, Assiut 71524, Egypt.

<sup>g</sup>National Center for Natural Products Research, Research Institute of Pharmaceutical Sciences, School of Pharmacy, The University of Mississippi, University, Mississippi 38677, USA.

<sup>h</sup>Department of BioMolecular Sciences, Division of Pharmacognosy, School of Pharmacy, University of Mississippi, University, Mississippi 38677, USA.

<sup>i</sup>Department of Pharmacognosy, Faculty of Pharmacy, Assiut University, Assiut 71526, Egypt.

<sup>j</sup>Department of Pharmacognosy, Faculty of Pharmacy, Badr University in Assiut, Assiut 77771, Egypt.

## Contents:

### NMR data of known compounds.

**Figure S1.** Negative HR-ESI-MS spectrum of compound **1**.

**Figure S2.** Expanded negative HR-ESI-MS spectrum of compound **1**.

**Figure S3.**  $^1\text{H}$ -NMR spectrum of compound **1** (400 MHz,  $\text{CD}_3\text{OD}$ ).

**Figure S4.** DEPT-Q spectrum of compound **1** (100 MHz,  $\text{CD}_3\text{OD}$ ).

**Figure S5.** HSQC spectrum of compound **1** ( $\text{CD}_3\text{OD}$ ).

**Figure S6.** HMBC spectrum of compound **1** ( $\text{CD}_3\text{OD}$ ).

**Figure S7.**  $^1\text{H}$ - $^1\text{H}$  COSY spectrum of compound **1** ( $\text{CD}_3\text{OD}$ ).

**Figure S8.** Negative HR-ESI-MS spectrum of compound **2**.

**Figure S9.**  $^1\text{H}$ -NMR spectrum of compound **2** (400 MHz,  $\text{DMSO-}d_6$ ).

**Figure S10.** DEPT-Q spectrum of compound **2** (100 MHz,  $\text{DMSO-}d_6$ ).

**Figure S11.** HSQC spectrum of compound **2** ( $\text{DMSO-}d_6$ ).

**Figure S12.** HMBC spectrum of compound **2** ( $\text{DMSO-}d_6$ ).

**Figure S13.**  $^1\text{H}$ - $^1\text{H}$  COSY spectrum of compound **2** ( $\text{DMSO-}d_6$ ).

**Figure S14.**  $^1\text{H}$ -NMR spectrum of compound **3** (400 MHz,  $\text{DMSO-}d_6$ ).

**Figure S15.** DEPT-Q spectrum of compound **3** (100 MHz,  $\text{DMSO-}d_6$ ).

**Figure S16.**  $^1\text{H}$ -NMR spectrum of compound **4** (400 MHz,  $\text{DMSO-}d_6$ ).

**Figure S17.**  $^{13}\text{C}$ -NMR spectrum of compound **4** (100 MHz,  $\text{DMSO-}d_6$ ).

**Figure S18.**  $^1\text{H}$ -NMR spectrum of compound **5** (500 MHz,  $\text{DMSO-}d_6$ ).

**Figure S19.**  $^{13}\text{C}$ -NMR spectrum of compound **5** (125 MHz,  $\text{DMSO-}d_6$ ).

**Figure S20.**  $^1\text{H}$ -NMR spectrum of compound **6** (500 MHz,  $\text{DMSO-}d_6$ ).

**Figure S21.**  $^{13}\text{C}$ -NMR spectrum of compound **6** (125 MHz,  $\text{DMSO-}d_6$ ).

**Figure S22.** Negative HR-ESI-MS spectrum of compound **7**.

**Figure S23.**  $^1\text{H-NMR}$  spectrum of compound **7** (500 MHz,  $\text{CDCl}_3$ ).

**Figure S24.**  $^{13}\text{C-NMR}$  spectrum of compound **7** (125 MHz,  $\text{CDCl}_3$ ).

**Figure S25.**  $^1\text{H-NMR}$  spectrum of compound **8** (400 MHz,  $\text{CDCl}_3$ ).

**Figure S26.** DEPT-Q spectrum of compound **8** (100 MHz,  $\text{CDCl}_3$ ).

**Figure S27.** Positive HR-ESI-MS spectrum of compound **9**.

**Figure S28.**  $^1\text{H-NMR}$  spectrum of compound **9** (400 MHz,  $\text{CDCl}_3$ ).

**Figure S29.** DEPT-Q spectrum of compound **9** (100 MHz,  $\text{CDCl}_3$ ).

**Figure S30.**  $^1\text{H-NMR}$  spectrum of compound **10** (400 MHz,  $\text{CDCl}_3$ ).

**Figure S31.** DEPT-Q spectrum of compound **10** (100 MHz,  $\text{CDCl}_3$ ).

**Figure S32.** Negative HR-ESI-MS spectrum of compound **11**.

**Figure S33.**  $^1\text{H-NMR}$  spectrum of compound **11** (400 MHz,  $\text{DMSO-}d_6$ ).

**Figure S34.** DEPT-Q spectrum of compound **11** (100 MHz,  $\text{DMSO-}d_6$ ).

**Figure S35.** Positive HR-ESI-MS spectrum of compound **12**.

**Figure S36.**  $^1\text{H-NMR}$  spectrum of compound **12** (400 MHz,  $\text{CD}_3\text{OD}$ ).

**Figure S37.** DEPT-Q spectrum of compound **12** (100 MHz,  $\text{CD}_3\text{OD}$ ).

**Table S1.** Chemical quantum descriptors and their equations (1-8).

**Table S2.** Calculated quantum-chemical parameters of the compounds (**1**, **2** & **11**) using the B3LYP/6-311++G (2d,2p) method.

## NMR data of known compounds:

### 2'-Deoxyuridine (3):

$^1\text{H-NMR}$  spectrum (400 MHz,  $\text{DMSO-}d_6$ ):  $\delta_{\text{H}}$  7.84 (1H, d,  $J = 8.0$ , H-4), 6.15 (1H, t,  $J = 6.4$ , H-1'), 5.61 (1H, d,  $J = 8.0$ , H-3), 4.22 (1H, m, H-3'), 3.77 (1H, m, H-4'), 3.55 (1H, m, H-5'), 2.07 (2H, m, H-2').

DEPT-Q spectrum (100 MHz,  $\text{DMSO-}d_6$ ):  $\delta_{\text{C}}$  39.93 (C-2'), 61.26 (C-5'), 70.36 (C-3'), 84.04 (C-1'), 87.04 (C-4'), 101.62 (C-3), 140.56 (C-4), 150.57 (C-2), 163.37 (C-6).

### Inosine (4):

$^1\text{H-NMR}$  spectrum (400 MHz,  $\text{DMSO-}d_6$ ):  $\delta_{\text{H}}$  8.32 (1H, s, H-3), 8.07 (1H, s, H-3), 5.86 (1H, d,  $J = 5.6$ , H-5), 3.0-5.0 (5H, ribose protons).

$^{13}\text{C-NMR}$  spectrum (100 MHz,  $\text{DMSO-}d_6$ ):  $\delta_{\text{C}}$  138.6 (C-1), 146.3 (C-2), 148.3 (C-3), 157.2 (C-4), 124.5 (C-5), 87.6 (C-1'), 70.4 (C-2'), 74.1 (C-3'), 85.7 (C-4'), 61.4 (C-5').

### Thymidine (5):

$^1\text{H-NMR}$  spectrum (500 MHz,  $\text{DMSO-}d_6$ ):  $\delta_{\text{H}}$  7.69 (1H, s, H-6), 6.16 (1H, t,  $J = 7.0$ , H-1'), 4.23 (1H, br.s, H-3'), 3.75 (1H, m, H-4'), 3.59 (1H, dd,  $J = 4.0, 12.0$ , H-5'a), 3.53 (1H, dd,  $J = 4.0, 12.0$ , H-5'b), 2.08 (2H, m, H-2'), 1.76 (3H, s,  $\text{CH}_3$ ).

$^{13}\text{C-NMR}$  spectrum (125 MHz,  $\text{DMSO-}d_6$ ):  $\delta_{\text{C}}$  163.8 (C-4), 150.5 (C-2), 136.2 (C-6), 109.4 (C-5), 87.3 (C-4'), 83.8 (C-1'), 70.5 (C-3'), 61.4 (C-5'), 40.0 (C-2'), 12.3 ( $\text{CH}_3$ ).

### Uracil (6):

$^1\text{H-NMR}$  spectrum (500 MHz,  $\text{DMSO-}d_6$ ):  $\delta_{\text{H}}$  7.38 (1H, d,  $J = 8$  Hz) and 5.44 (1H, d,  $J = 7.5$  Hz).

$^{13}\text{C-NMR}$  spectrum (125 MHz,  $\text{DMSO-}d_6$ ):  $\delta_{\text{C}}$  164.4 (C-4), 151.6 (C-2), 142.3 (C-6) and 100.2 (C-5).

### **Glyceryl monopalmitate (7):**

The negative HR-ESI-MS analysis showed a characteristic molecular ion peak  $[M+HCOO]^-$  at  $m/z$  375.2772 (calcd for  $C_{20}H_{39}O_6$ , 375.2747).

$^1H$ -NMR spectrum (500 MHz,  $CDCl_3$ ):  $\delta_H$  4.21 (1H, dd,  $J = 11.5, 4.5$  Hz, H-1a), 4.15 (1H, dd,  $J = 12.0, 6.5$  Hz, H-1b), 3.93 (1H, m, H-2), 3.69 (1H, dd,  $J = 11.5, 4.0$  Hz, H-3a), 3.61 (1H, dd,  $J = 11.5, 6.0$  Hz, H-3b), 2.36 (2H, t,  $J = 7.5$  Hz, H-2'), 0.88 (3H, t,  $J = 7.0$  Hz, H-16').

$^{13}C$ -NMR spectrum (125 MHz,  $CDCl_3$ ):  $\delta_C$  174.5 (C-1), 34.3 (C-2), 32.1 (C-3), 29.8-22.8 (C-4~15), 14.3 (C-16), 65.3 (C-1'), 70.4 (C-2'), 63.5 (C-3').

### **Benzyl benzoate (8):**

$^1H$ -NMR spectrum (400 MHz,  $CDCl_3$ ):  $\delta_H$  8.10 (2H, d,  $J = 8$ , H-2'/H-6'), 8.08 (2H, d,  $J = 8$ , H-2/H-6), 7.58 (1H, t,  $J = 7.5$ , H-4'), 7.55 (1H, t,  $J = 7.5$ , H-4), 7.45 (2H, m, H-3'/H-5'), 7.40 (2H, m, H-3/H-5), 5.38 (s, 2H).

DEPT-Q spectrum (100 MHz,  $CDCl_3$ ):  $\delta_C$  166.6 (C-7'), 136.3 (C-1), 133.2 (C-4'), 129.8 (C-1'), 128.7 (C-2'/C-6'), 128.5 (C-4), 128.4 (C-3'/C-5'), 128.4 (C-2/C-6), 128.3 (C-3/C-5), 66.8 (C-7).

### **Methyl-(E)-nonadec-10-enoate (9):**

The positive HR-ESI-MS analysis showed a characteristic molecular ion peak  $[M+K]^+$  at  $m/z$  349.1776 (calcd for  $C_{20}H_{38}KO_2$ , 349.2509).

$^1H$ -NMR spectrum (400 MHz,  $CDCl_3$ ):  $\delta_H$  5.33-5.36 (2H, m, H-11/H-10), 3.66 (3H, s, H-1'), 2.30 (2H, t,  $J = 8.0$ , H-2), 1.99 (4H, m, H-9/H-12), 1.62 (2H, m, H-3), 1.25-1.32 [22H, m, (H-4 to H-8) and (H-13 to H-18)], 0.88 (3H, t,  $J = 7.2$ , H-19).

DEPT-Q spectrum (100 MHz,  $CDCl_3$ ):  $\delta_C$  174.29 (C-1), 130.14 (C-11), 129.90 (C-10), 51.60 (C-1'), 34.26 (C-2), 31.93 (C-17), 29.88-29.14 [(C-4) to (C-8) and (C-13) to (C-16)], 27.37 (C-12), 27.31 (C-9), 25.10 (C-3), 22.81 (C-18), 14.26 (C-19).

**Cholesterol (10):**

<sup>1</sup>H-NMR spectrum (400 MHz, CDCl<sub>3</sub>): δ<sub>H</sub> 0.67 (3H, s, H-18), 0.86 (3H, d, J = 6.6, H-26), 0.84 (3H, d, J = 6.6, H-27), 0.91 (3H, d, J = 6.5, H-21), 1.02 (3H, s, H-19), 1.51 (2H, m, H-2), 1.99 (2H, m, H-7), 1.82 (2H, m, H-8), 2.26 (2H, m, H-4), 3.52 (1H, m, H-3), 5.34 (1H, br.d, J = 5.2, H-6).

DEPT-Q spectrum (100 MHz, CDCl<sub>3</sub>): δ<sub>C</sub> 12.01 (C-18), 18.86 (C-21), 19.55 (C-19), 21.23 (C-11), 22.71 (C-26), 22.98 (C-27), 23.97 (C-23), 24.44 (C-15), 28.16 (C-25), 28.38 (C-16), 31.76 (C-2), 32.02 (C-7), 32.05 (C-8), 35.94 (C-20), 36.33 (C-22), 37.39 (C-10), 39.65 (C-1), 39.66 (C-24), 39.92 (C-12), 42.40 (C-4), 42.41 (C-13), 50.26 (C-9), 56.28 (C-17), 56.90 (C-14), 71.95 (C-3), 121.86 (C-6), 140.86 (C-5).

**1,2-Di-O-palmitoyl-3-O-(6'''-sulfo-α-D-quinovopyranosyl)-glycerol (11):**

The negative HR-ESI-MS analysis showed a characteristic molecular ion peak [M-H]<sup>-</sup> at *m/z* 793.5311 (calcd for C<sub>41</sub>H<sub>77</sub>O<sub>12</sub>S, 793.5136).

<sup>1</sup>H-NMR spectrum (400 MHz, DMSO-*d*<sub>6</sub>): δ<sub>H</sub> 5.13 (1H, m, H-2), 4.57 (1H, d, J = 3.6, H-1'''), 4.34 (1H, dd, J = 2.8, 12.0, H-1a), 4.14 (1H, dd, J = 7.6, 12.0, H-1b), 3.88 (1H, dd, J = 6.0, 10.4, H-3a), 3.39 (1H, m, H-3b), 3.77 (1H, m, H-5'''), 3.34 (1H, m, H-3'''), 3.18 (1H, m, H-2'''), 2.92 (1H, m, H-4'''), 2.90 (1H, dd, J = 4.4, 14.0, H-6'''a), 2.55 (1H, dd, J = 6.8, 14.0, H-6'''a), 2.27 (2H, m, H-2'), 2.27 (2H, m, H-2''), 1.49 (2H, m, H-3'), 1.49 (2H, m, H-3''), 1.23 (24H, m, H-4' to H-15'), 1.23 (24H, m, H-4'' to H-15''), 0.85 (3H, t, J = 7.2, H-16'), 0.85 (3H, t, J = 7.2, H-16'').

DEPT-Q spectrum (100 MHz, DMSO-*d*<sub>6</sub>): δ<sub>C</sub> 172.55 (C-1'), 172.39 (C-1''), 98.29 (C-1'''), 74.29 (C-4'''), 72.91 (C-3'''), 71.63 (C-2'''), 69.73 (C-2), 68.56 (C-5'''), 64.61 (C-3), 62.65 (C-1), 54.57 (C-6'''), 33.58 (C-2'), 33.45 (C-2''), 31.33 (C-3'), 31.33 (C-3''), 29.11-22.13 (C-4') to (C-15'), 29.11-22.13 (C-4'') to (C-15''), 13.97 (C-16'), 13.97 (C-16'').

**Boldine (12):**

The positive HR-ESI-MS analysis (Figure S35) showed a characteristic molecular ion peak  $[M+H]^+$  at  $m/z$  328.1589 (calcd for  $C_{19}H_{22}NO_4$ , 328.1549).

$^1H$ -NMR spectrum (400 MHz,  $CD_3OD$ ):  $\delta_H$  2.76 (3H, s, N-CH<sub>3</sub>), 2.60-2.78 (3H, m, H-7b, H-4), 2.88-3.12 (4H, m, H-6a, H-5, H-7a), 3.58 (3H, s, 2-OCH<sub>3</sub>), 3.86 (3H, s, 10-OCH<sub>3</sub>), 6.59 (1H, s, H-3), 6.76 (1 H, s, H-8), 7.96 (1H, s, H-11).

DEPT-Q spectrum (100 MHz,  $CD_3OD$ ):  $\delta_C$  28.05 (C-4), 33.74 (C-7), 42.64 (N-CH<sub>3</sub>), 53.92 (C-5), 56.57 (10- OCH<sub>3</sub>), 60.34 (1-OCH<sub>3</sub>), 63.77 (C-6a), 112.73 (C-11), 115.14 (C-3), 115.98 (C-8), 124.02 (C-11c), 124.38 (C-11b), 128.17 (C-11a), 128.96 (C-3a), 129.36 (C-7a), 144.77 (C-1), 147.39 (C-9), 148.06 (C-10), 151.41 (C-2).

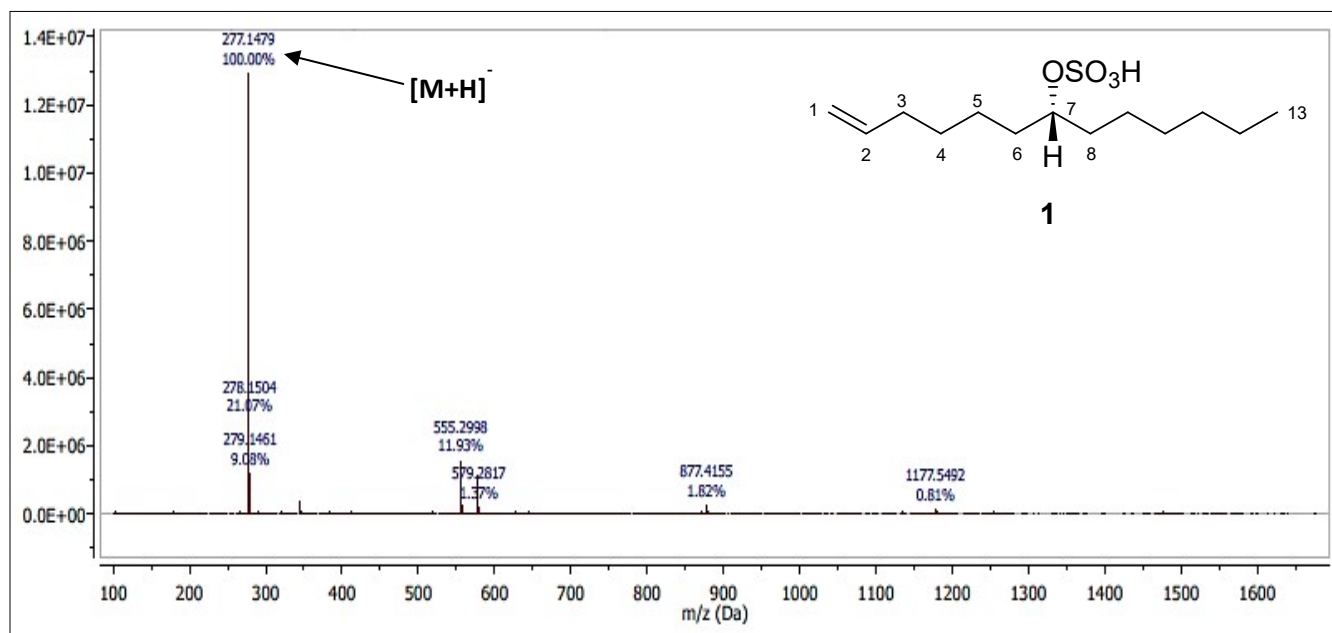

**Figure S1.** Negative HR-ESI-MS spectrum of compound **1**.



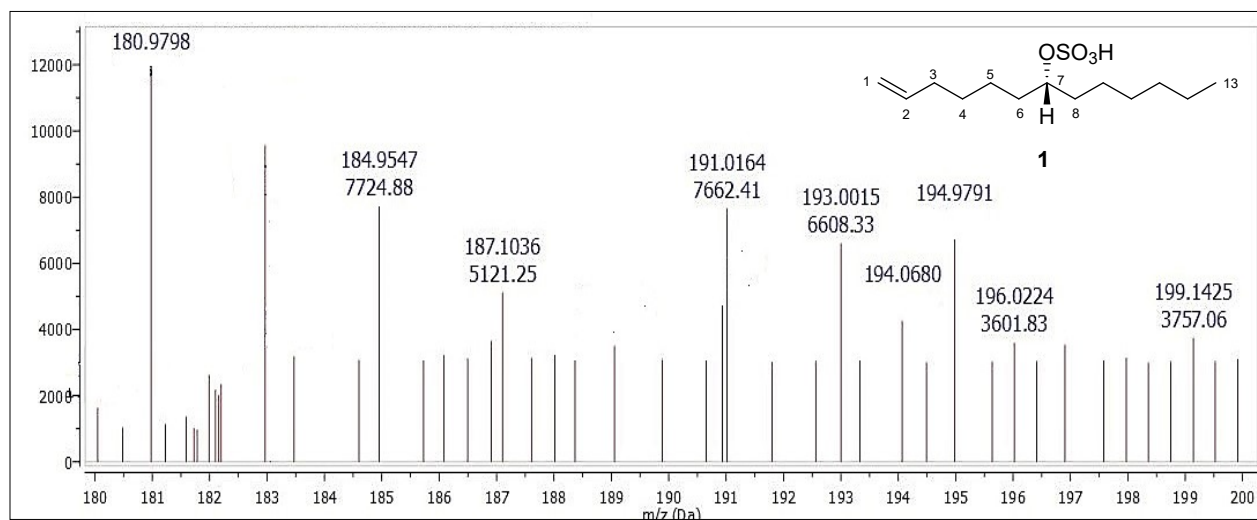

**Figure S2.** Expanded negative HR-ESI-MS spectrum of compound **1**.

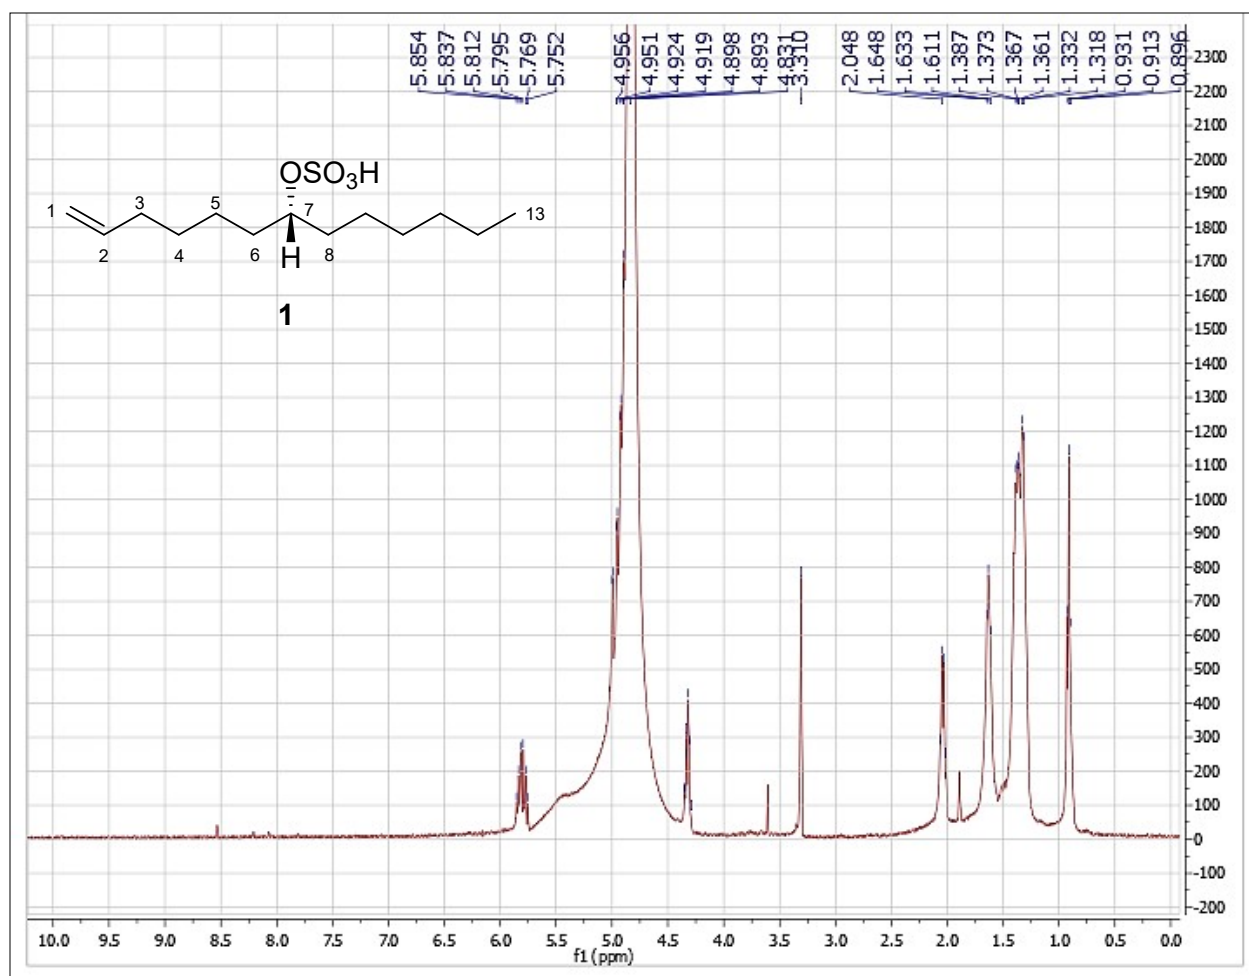

**Figure S3.** <sup>1</sup>H-NMR spectrum of compound **1** (400 MHz, CD<sub>3</sub>OD).

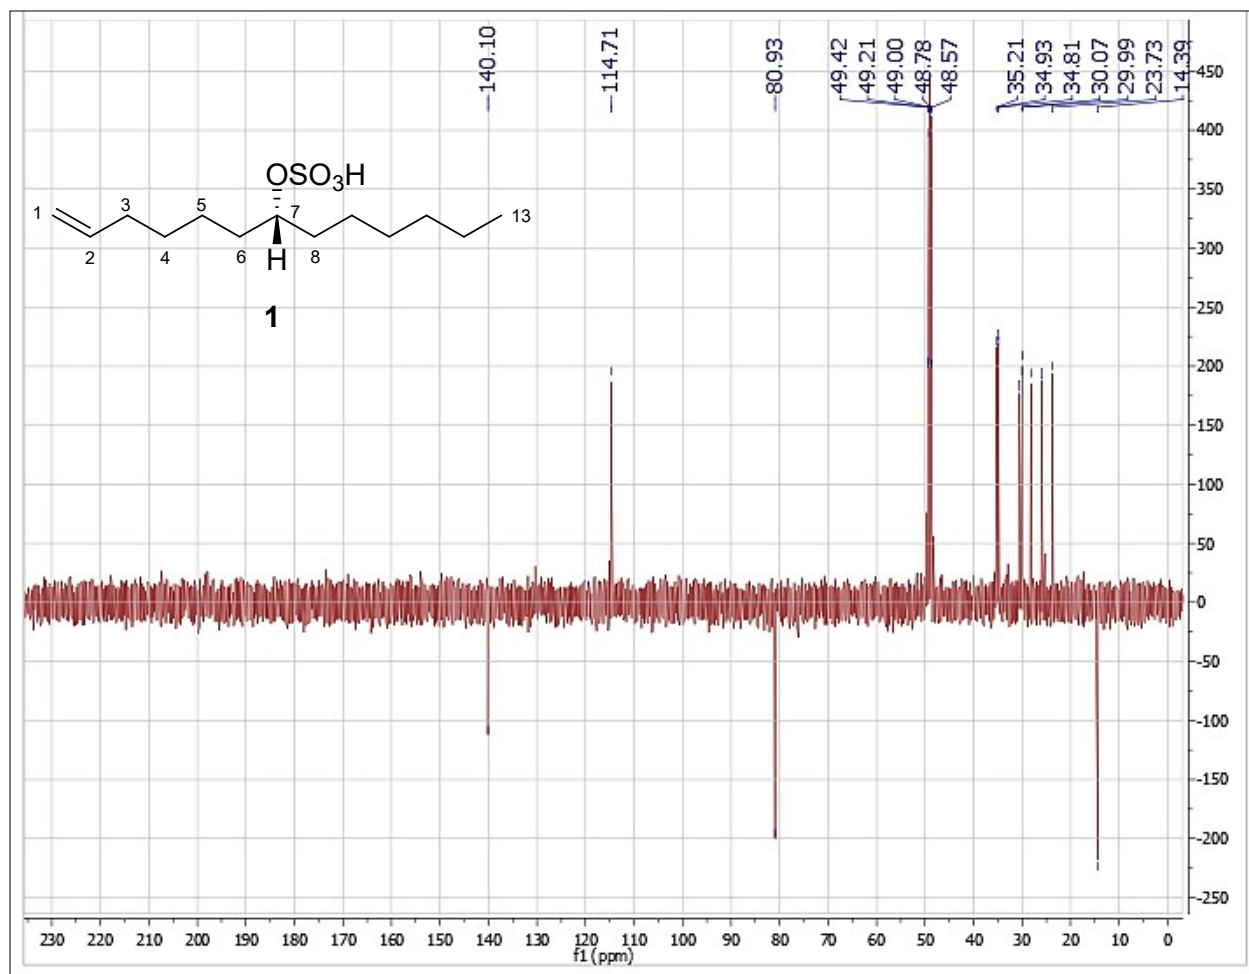

Figure S4. DEPT-Q spectrum of compound 1 (100 MHz, CD<sub>3</sub>OD).

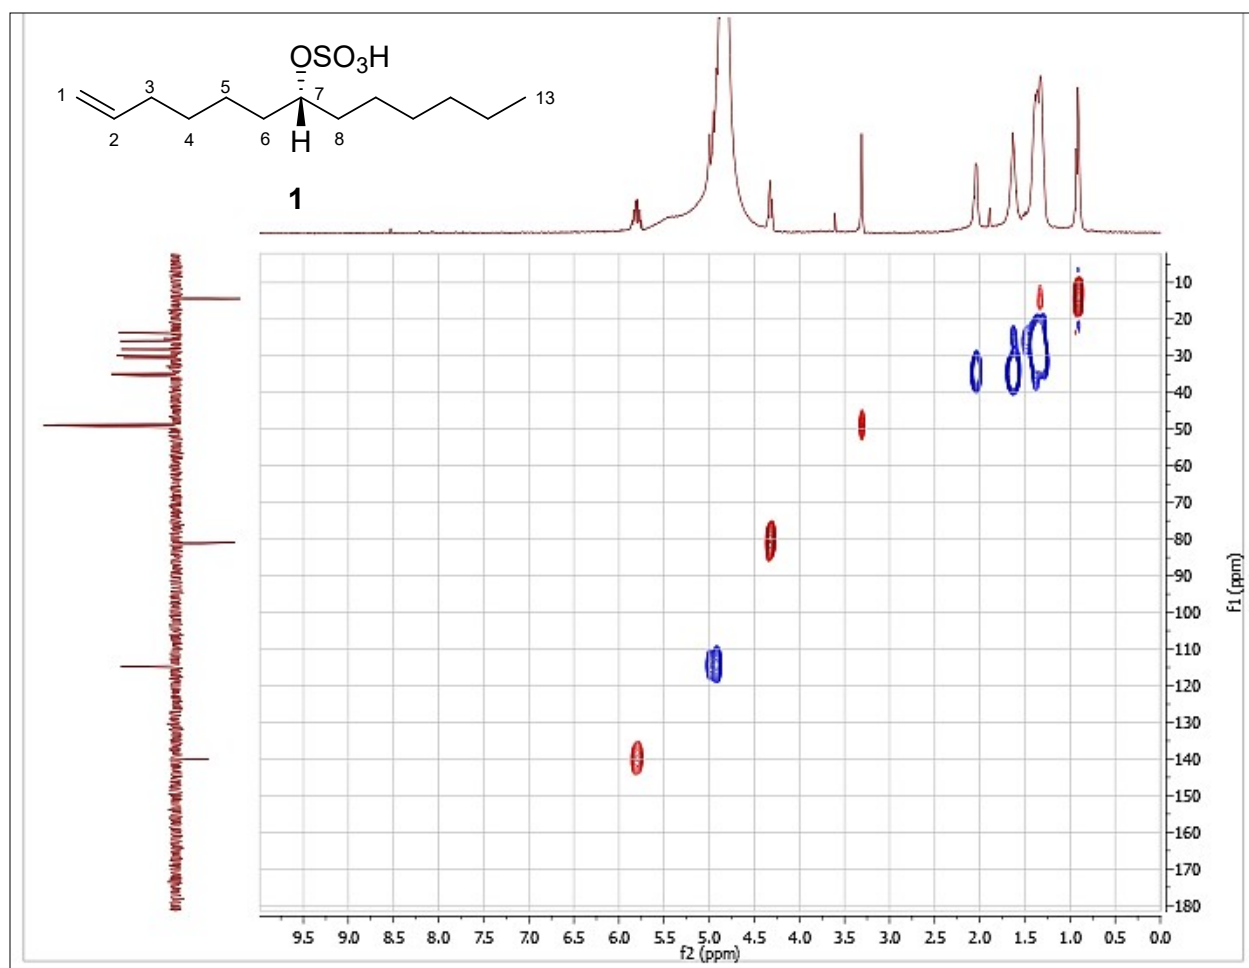

**Figure S5.** HSQC spectrum of compound **1** (CD<sub>3</sub>OD).

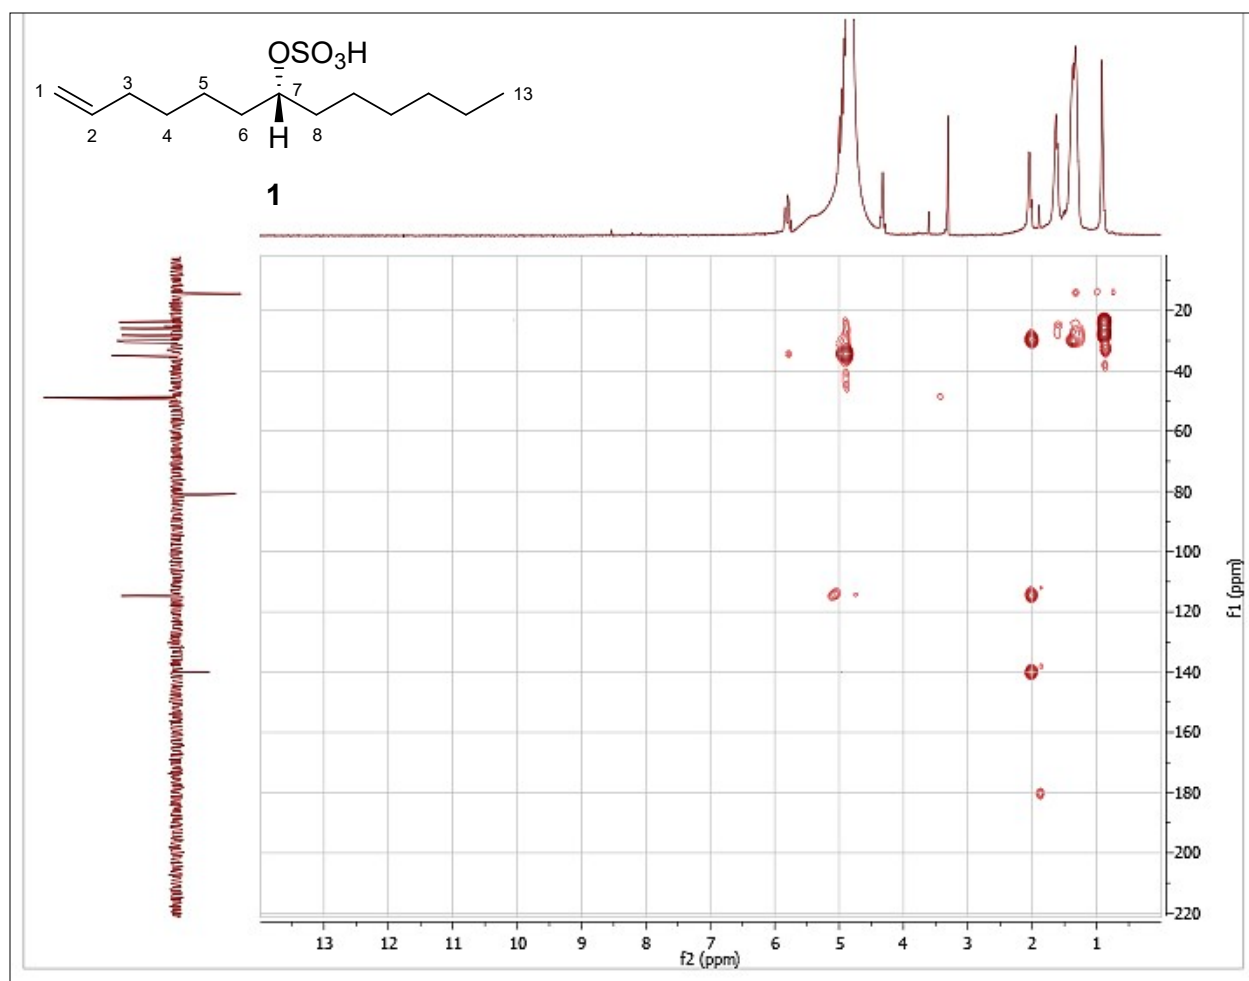

**Figure S6.** HMBC spectrum of compound **1** ( $\text{CD}_3\text{OD}$ ).

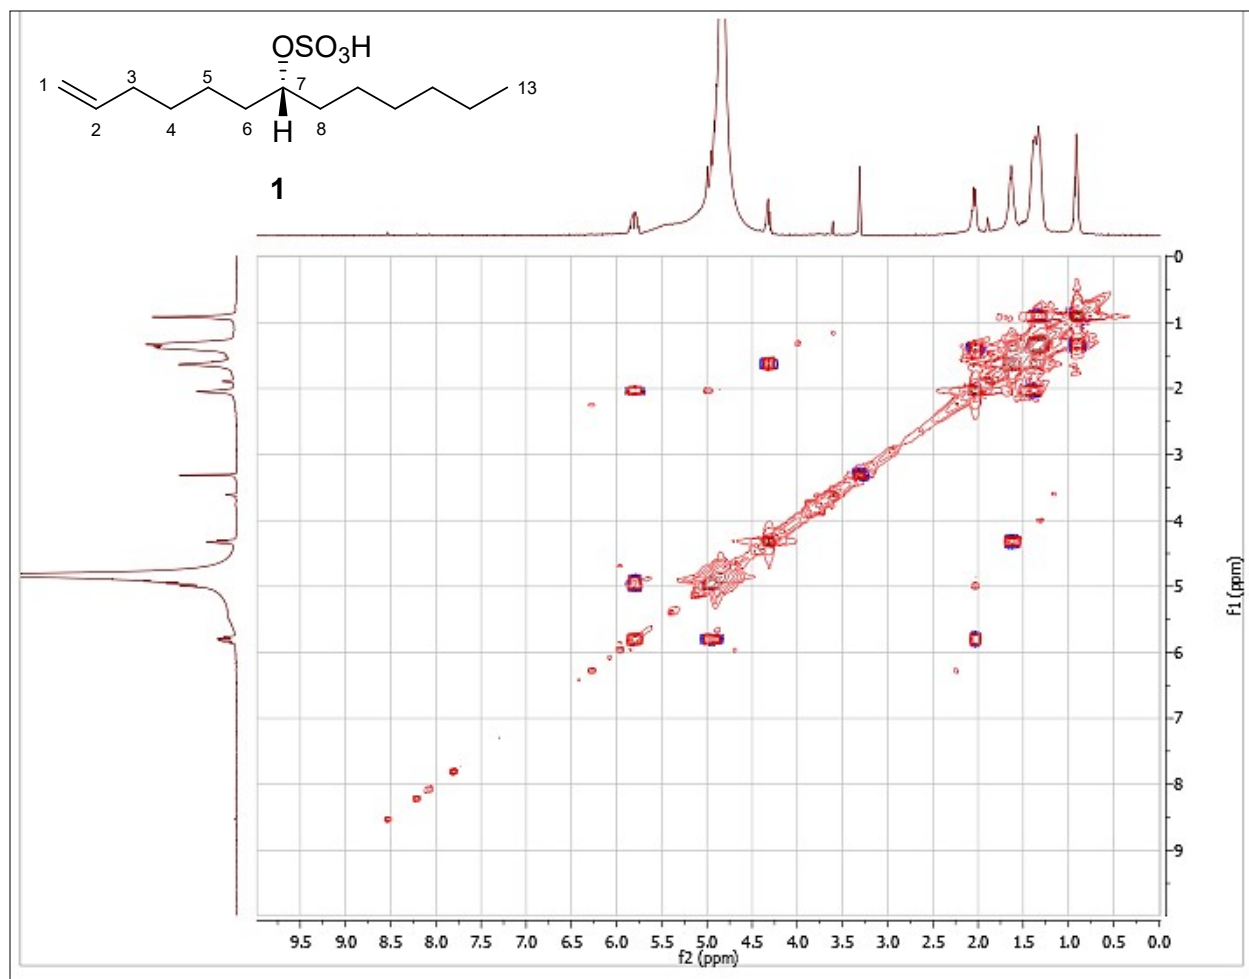

**Figure S7.**  $^1\text{H}$ - $^1\text{H}$  COSY spectrum of compound **1** ( $\text{CD}_3\text{OD}$ ).

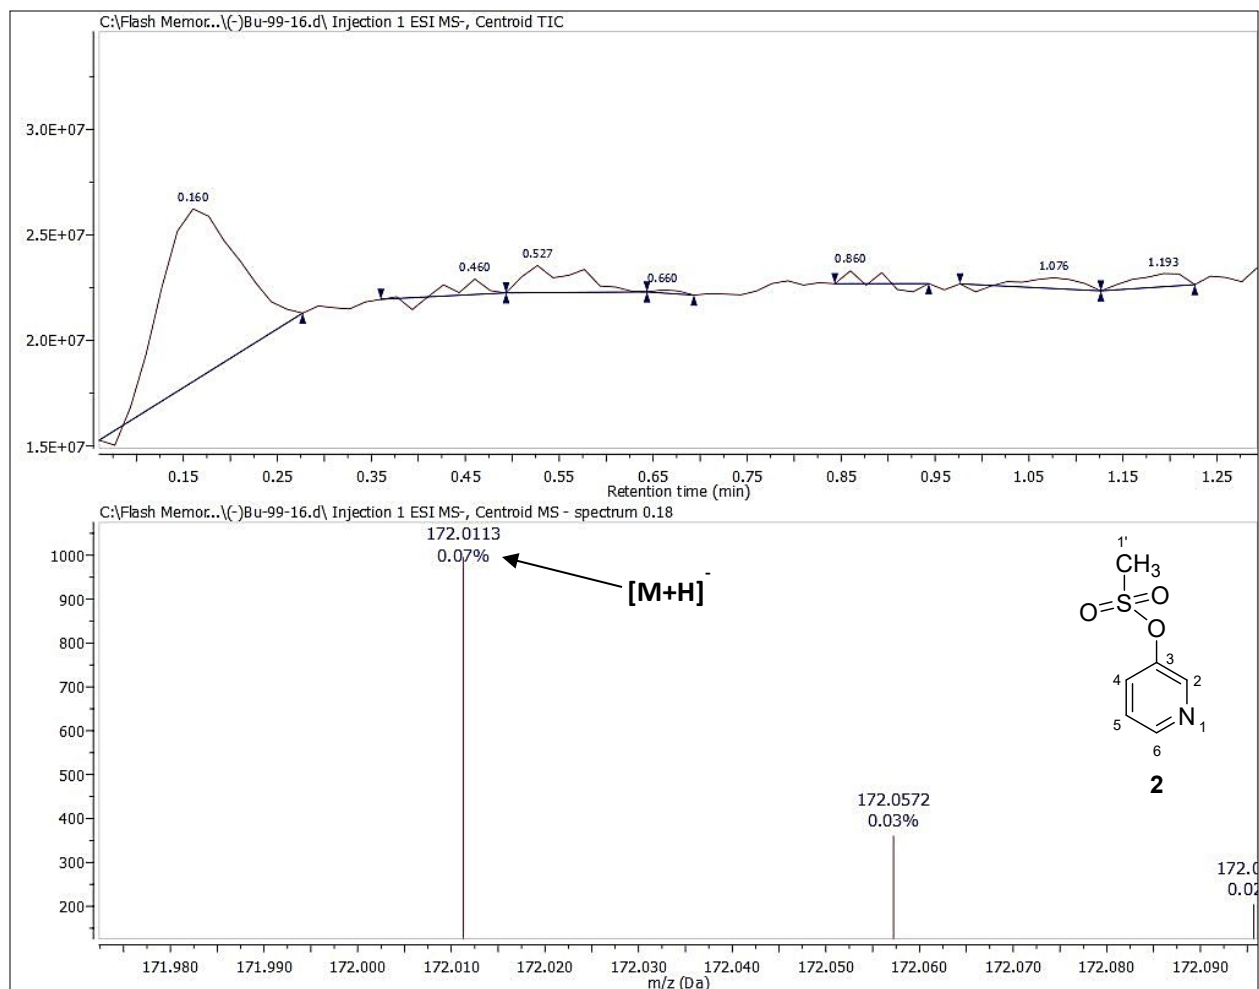

**Figure S8.** Negative HR-ESI-MS spectrum of compound **2**.

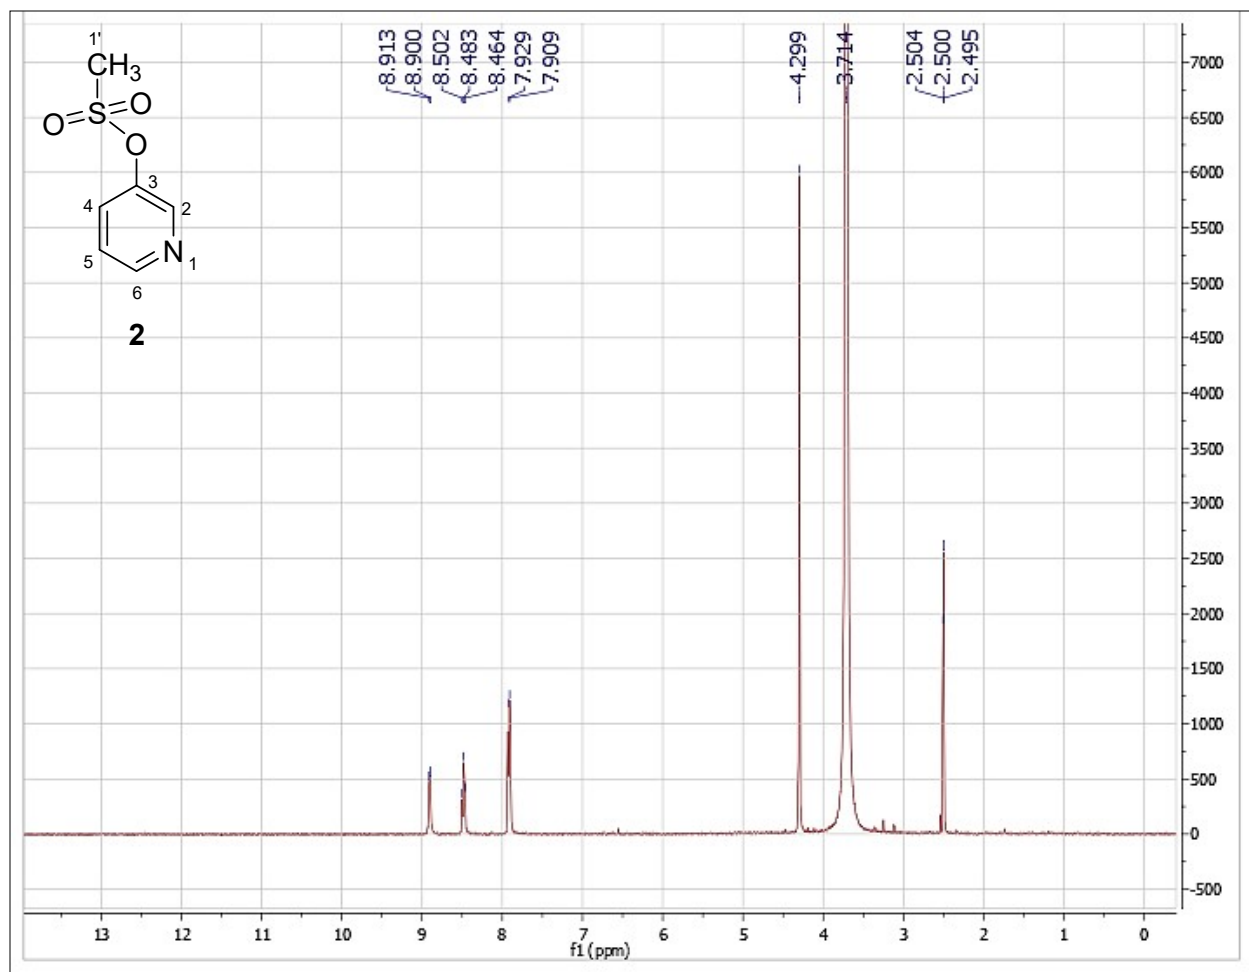

**Figure S9.**  $^1\text{H-NMR}$  spectrum of compound **2** (400 MHz,  $\text{DMSO-}d_6$ ).



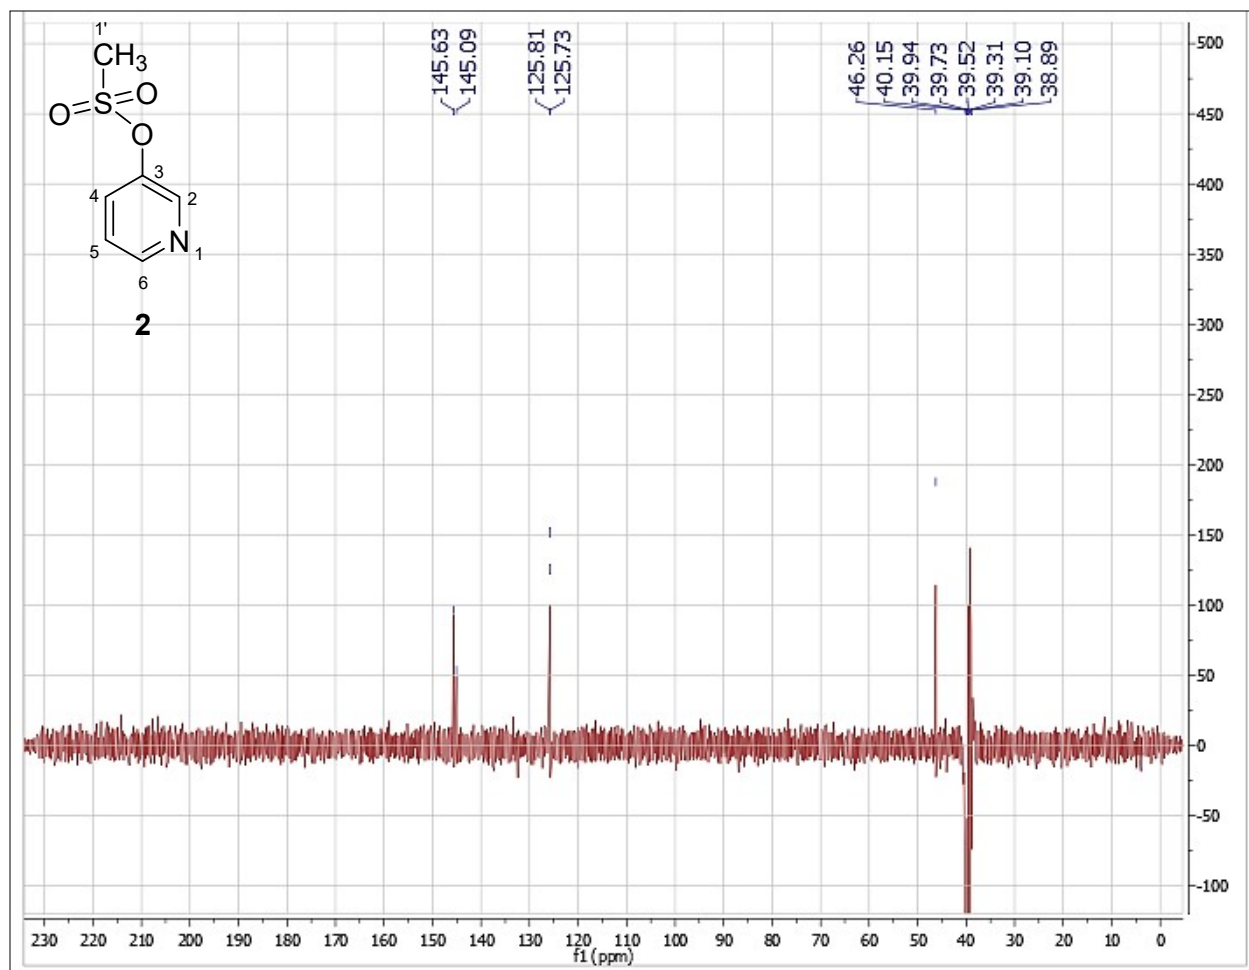

**Figure S10.** DEPT-Q spectrum of compound **2** (100 MHz, DMSO-*d*<sub>6</sub>).

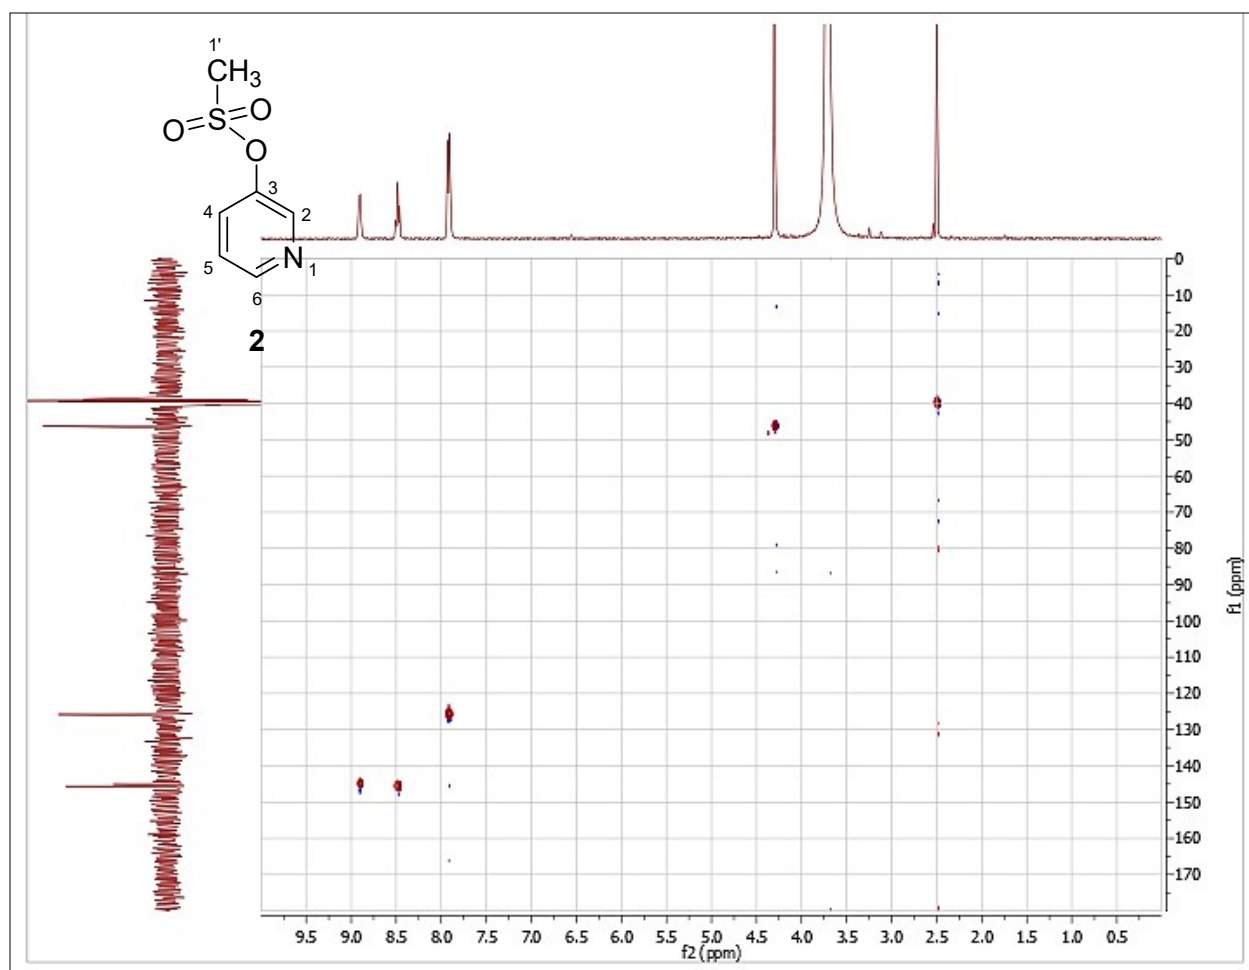

**Figure S11.** HSQC spectrum of compound **2** (DMSO-*d*<sub>6</sub>).

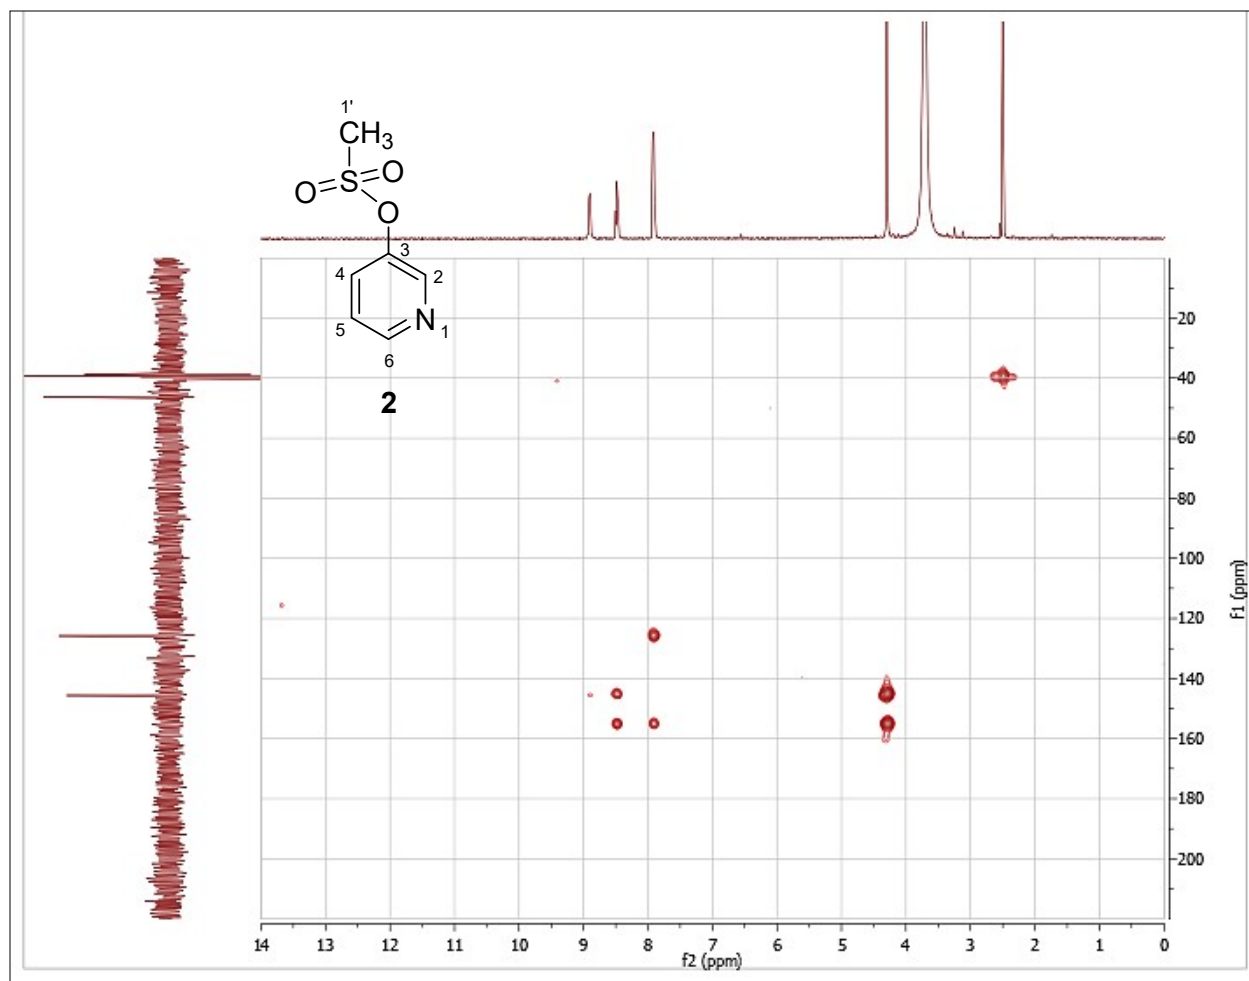

**Figure S12.** HMBC spectrum of compound **2** (DMSO-*d*<sub>6</sub>).

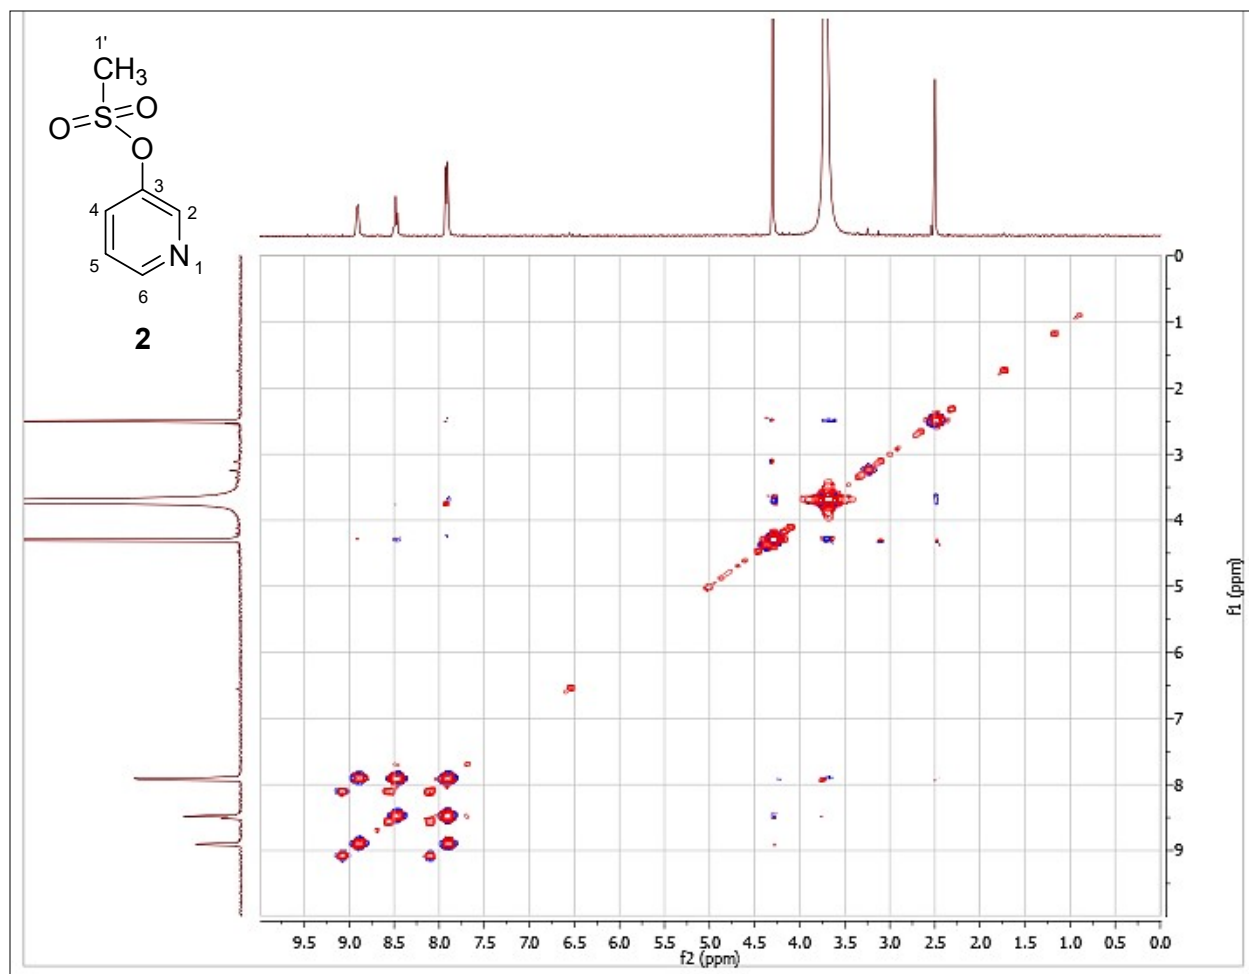

**Figure S13.** <sup>1</sup>H-<sup>1</sup>H COSY spectrum of compound **2** (DMSO-*d*<sub>6</sub>).

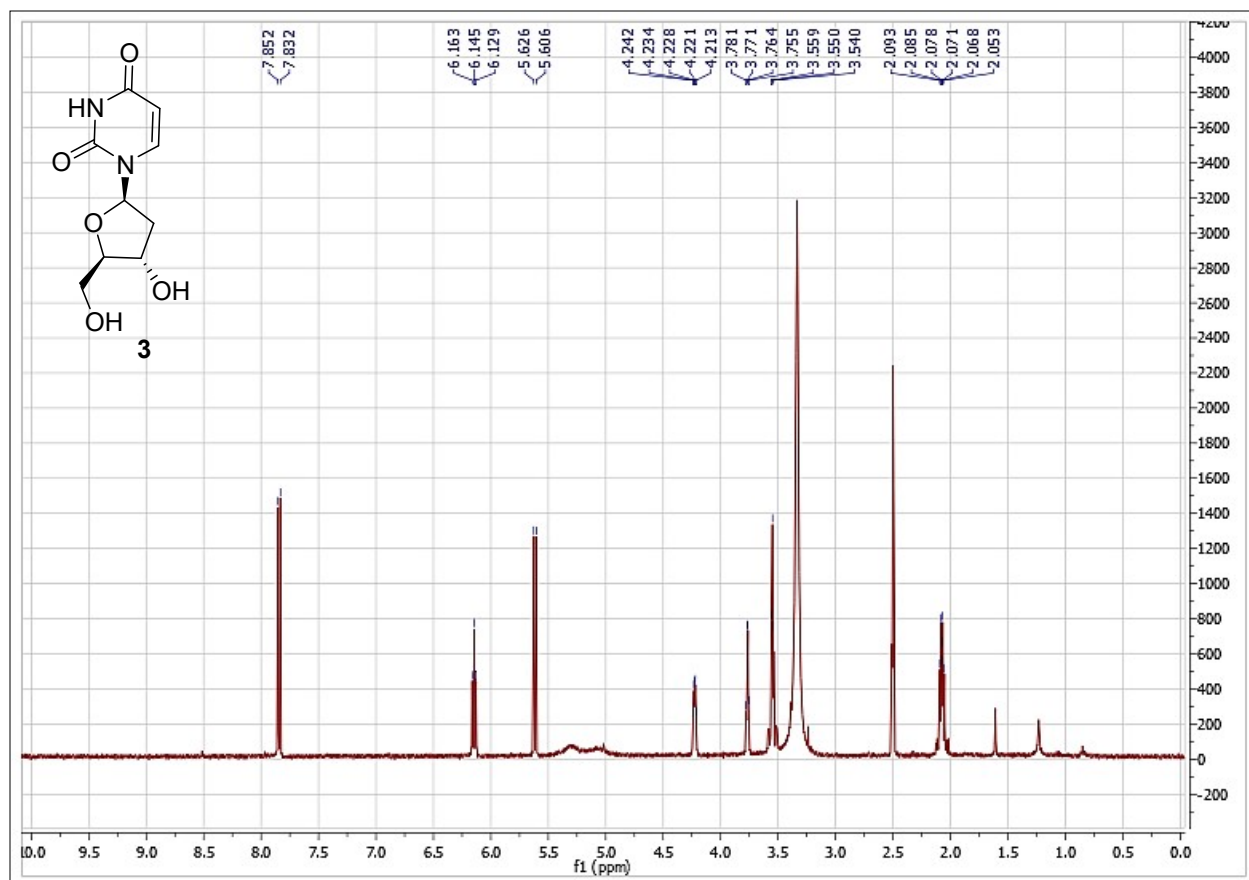

Figure S14.  $^1\text{H-NMR}$  spectrum of compound **3** (400 MHz,  $\text{DMSO-}d_6$ ).

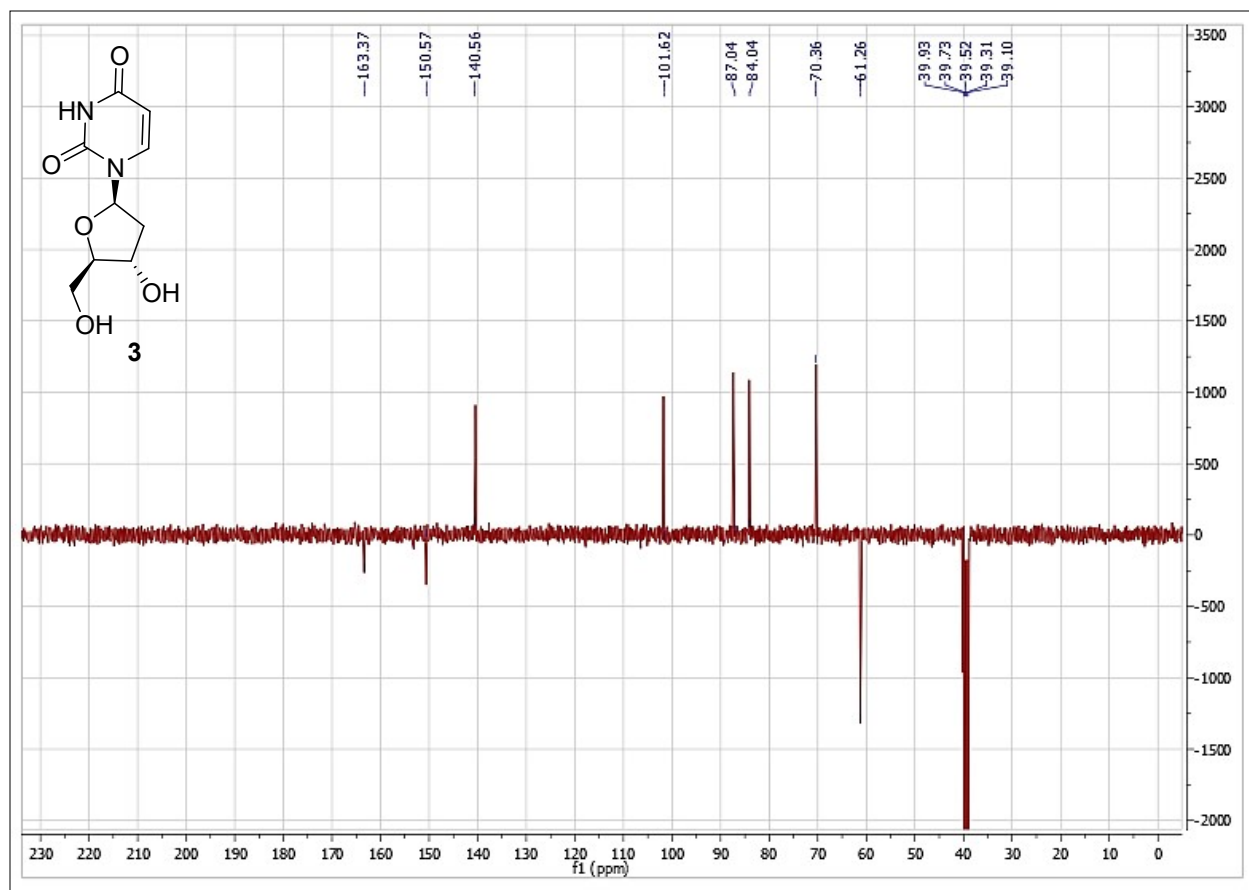

Figure S15. DEPT-Q spectrum of compound 3 (100 MHz, DMSO- $d_6$ ).

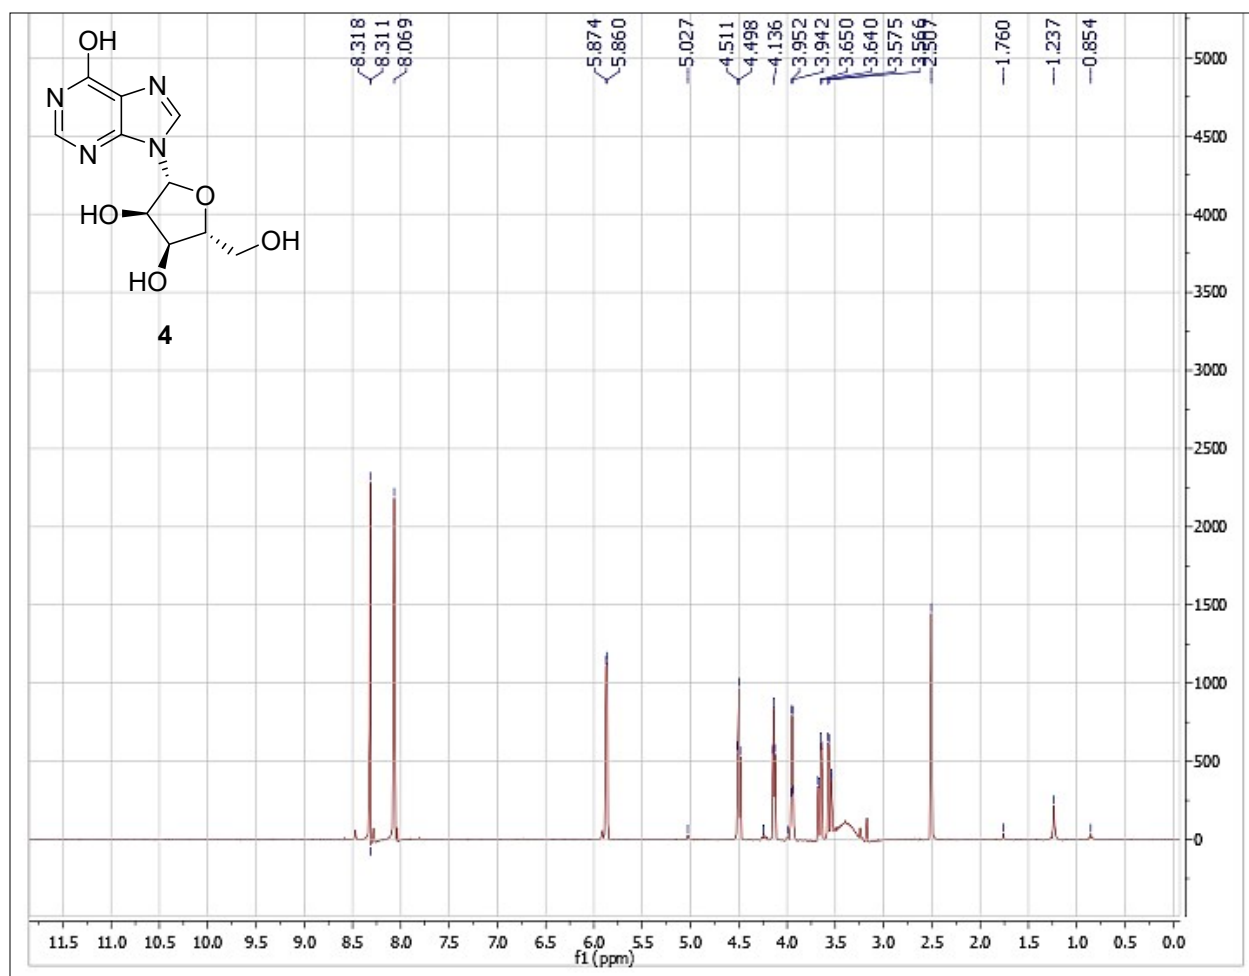

**Figure S16.**  $^1\text{H-NMR}$  spectrum of compound **4** (400 MHz,  $\text{DMSO-}d_6$ ).

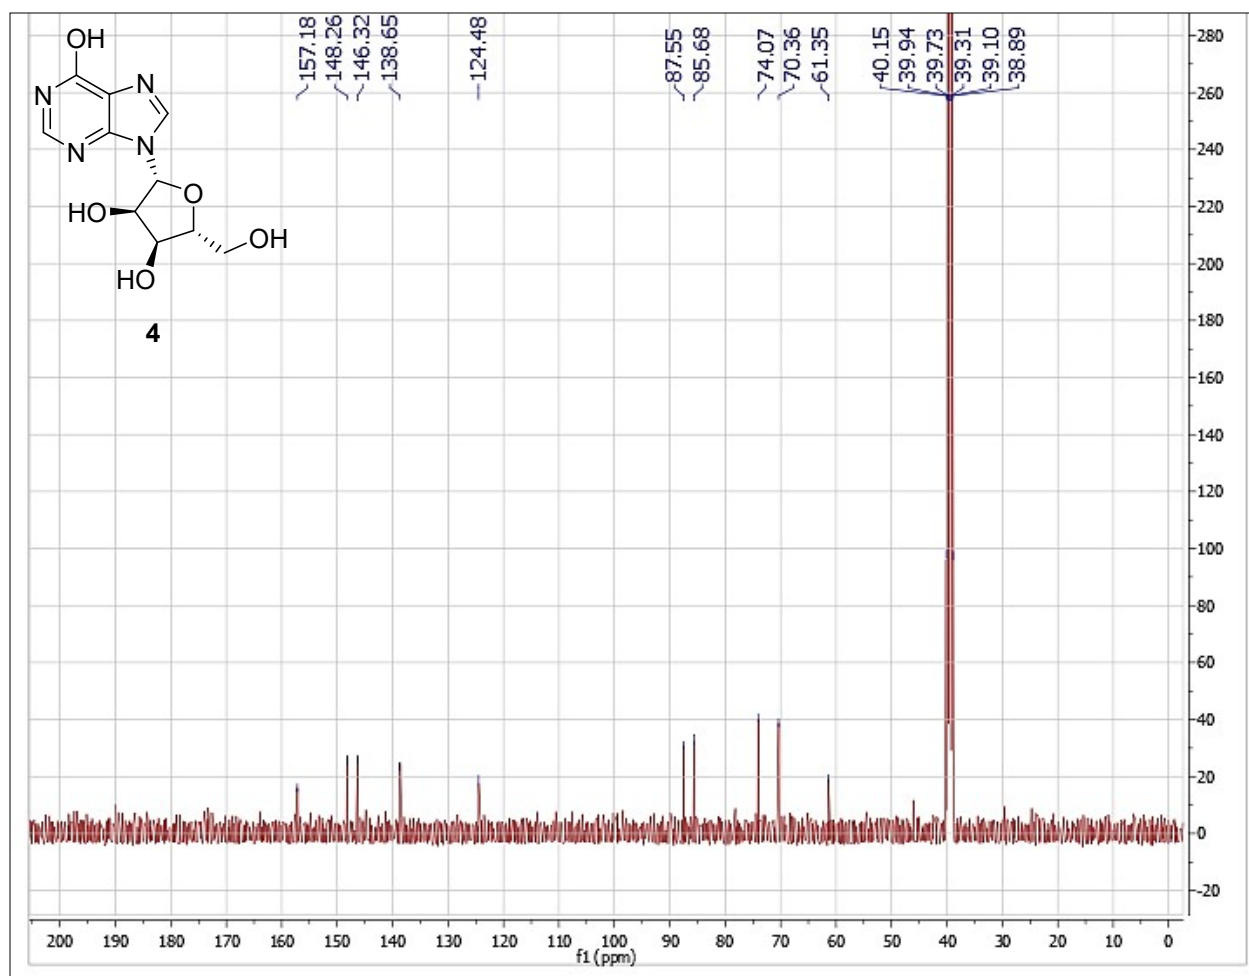

Figure S17.  $^{13}\text{C}$ -NMR spectrum of compound 4 (100 MHz,  $\text{DMSO-}d_6$ ).



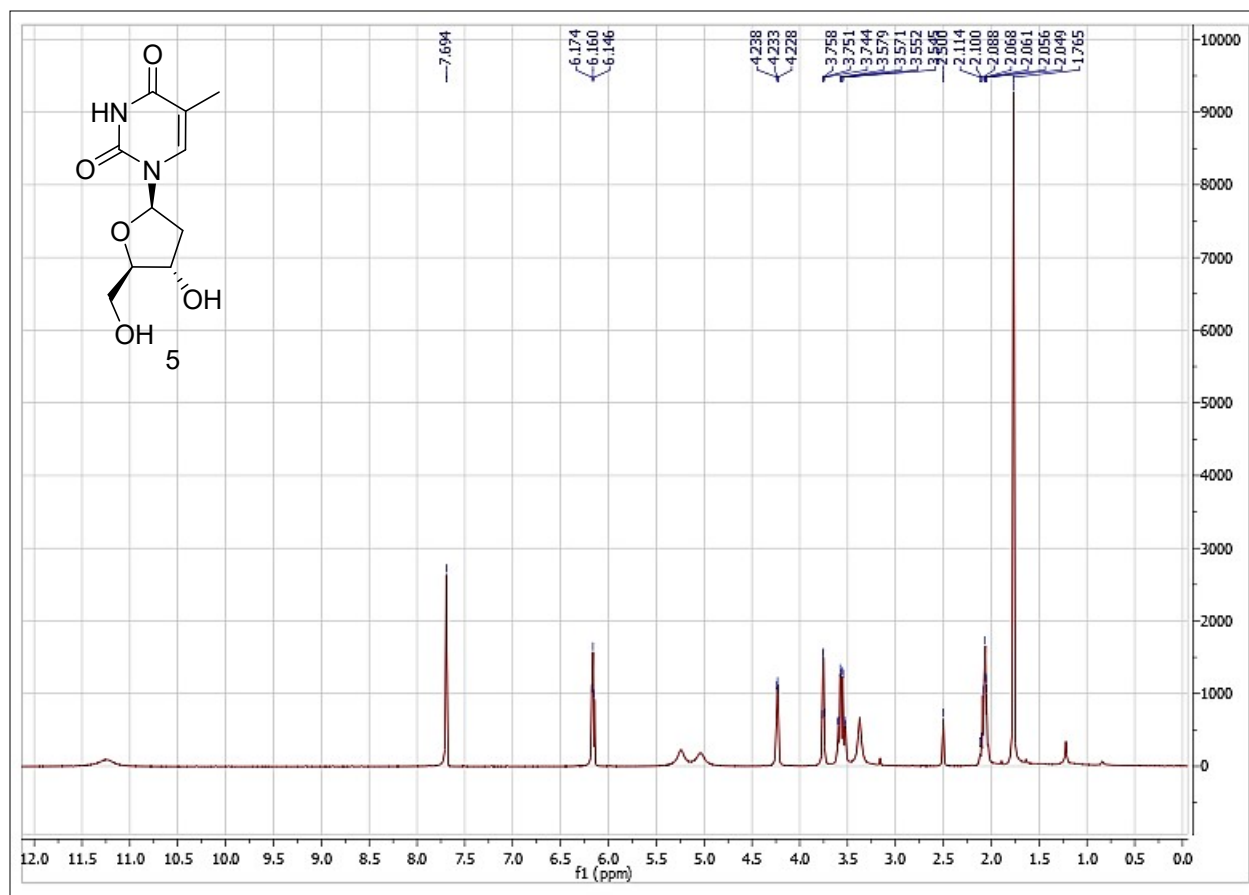

**Figure S18.** <sup>1</sup>H-NMR spectrum of compound **5** (500 MHz, DMSO-*d*<sub>6</sub>).

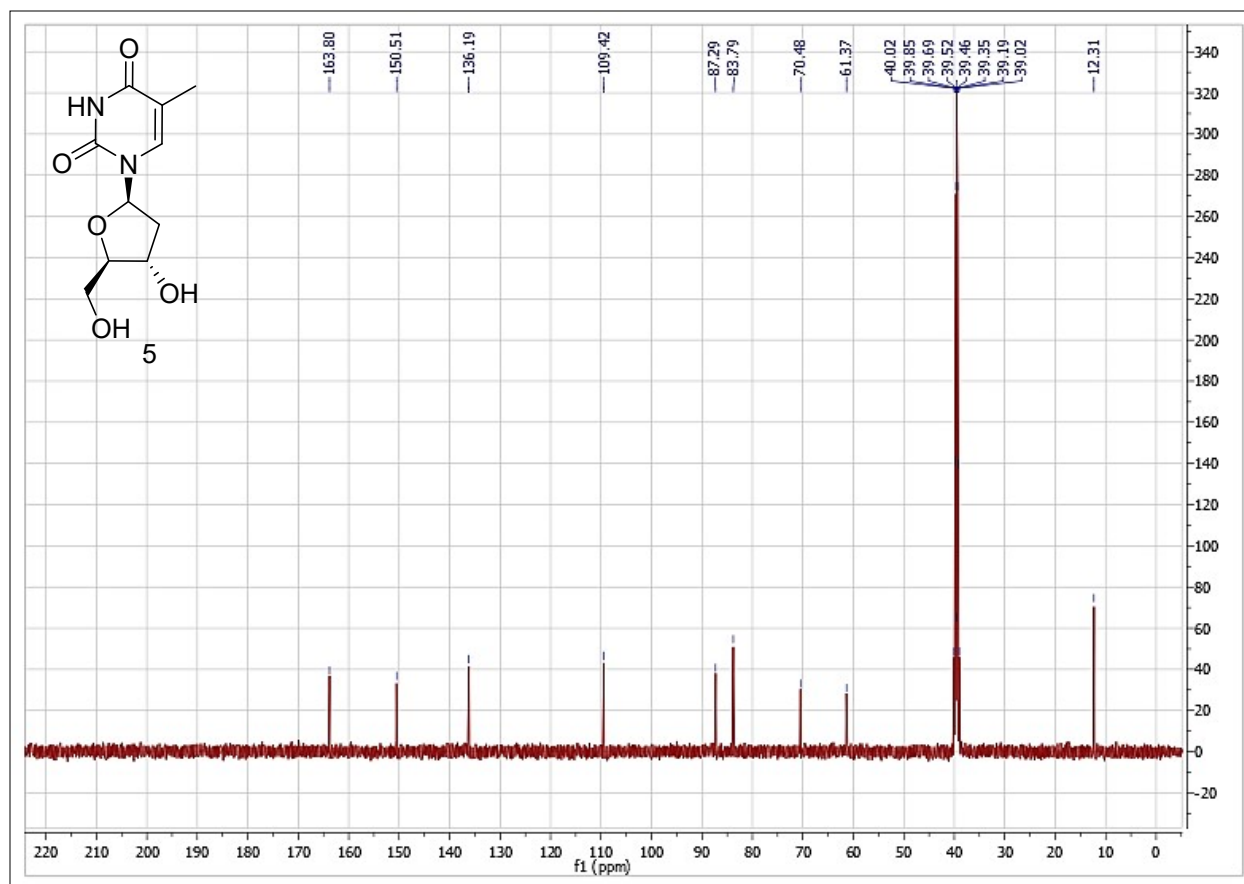

**Figure S19.**  $^{13}\text{C}$ -NMR spectrum of compound **5** (125 MHz,  $\text{DMSO-}d_6$ ).

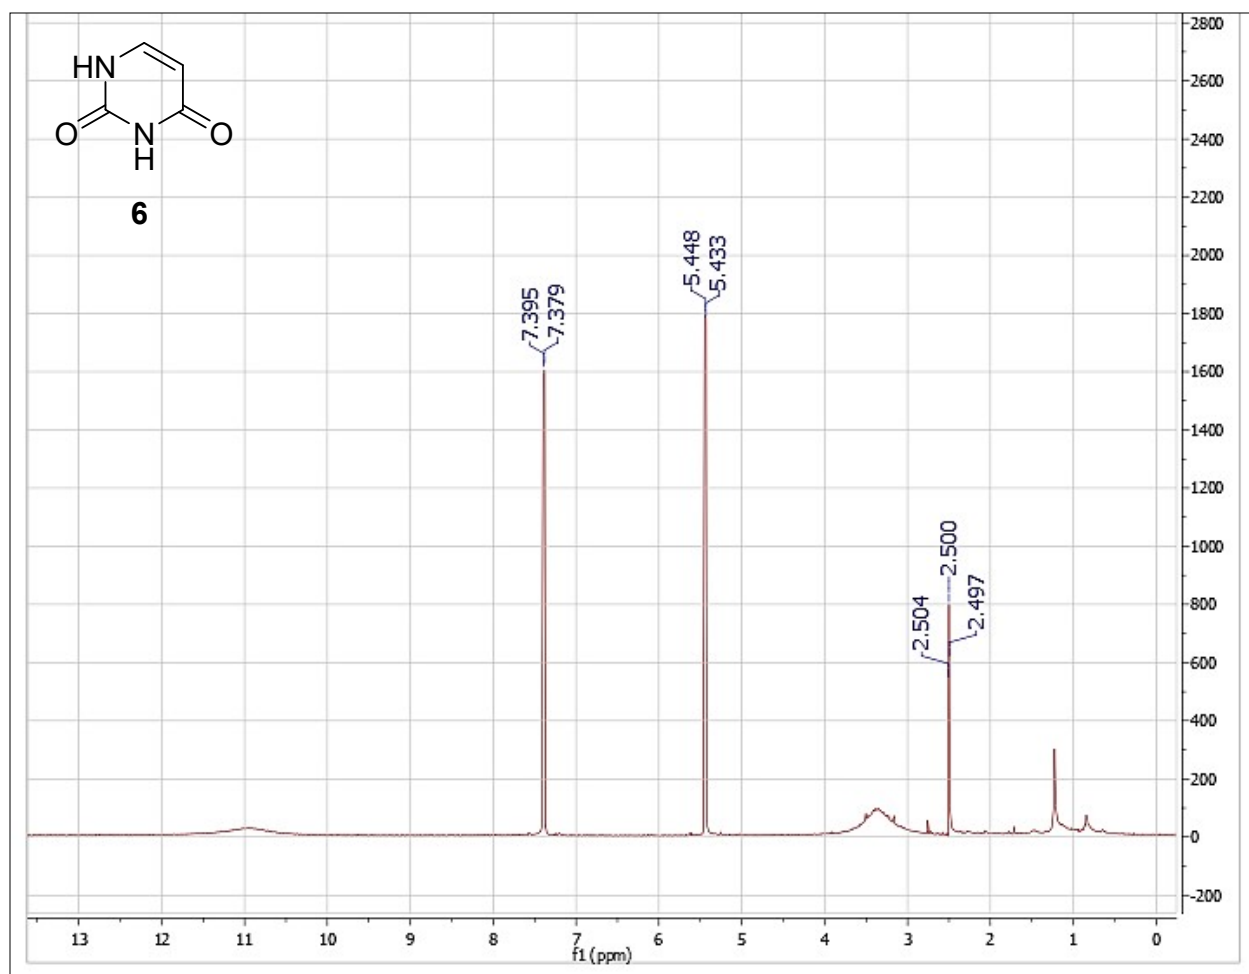

**Figure S20.**  $^1\text{H}$ -NMR spectrum of compound **6** (500 MHz,  $\text{DMSO-}d_6$ ).

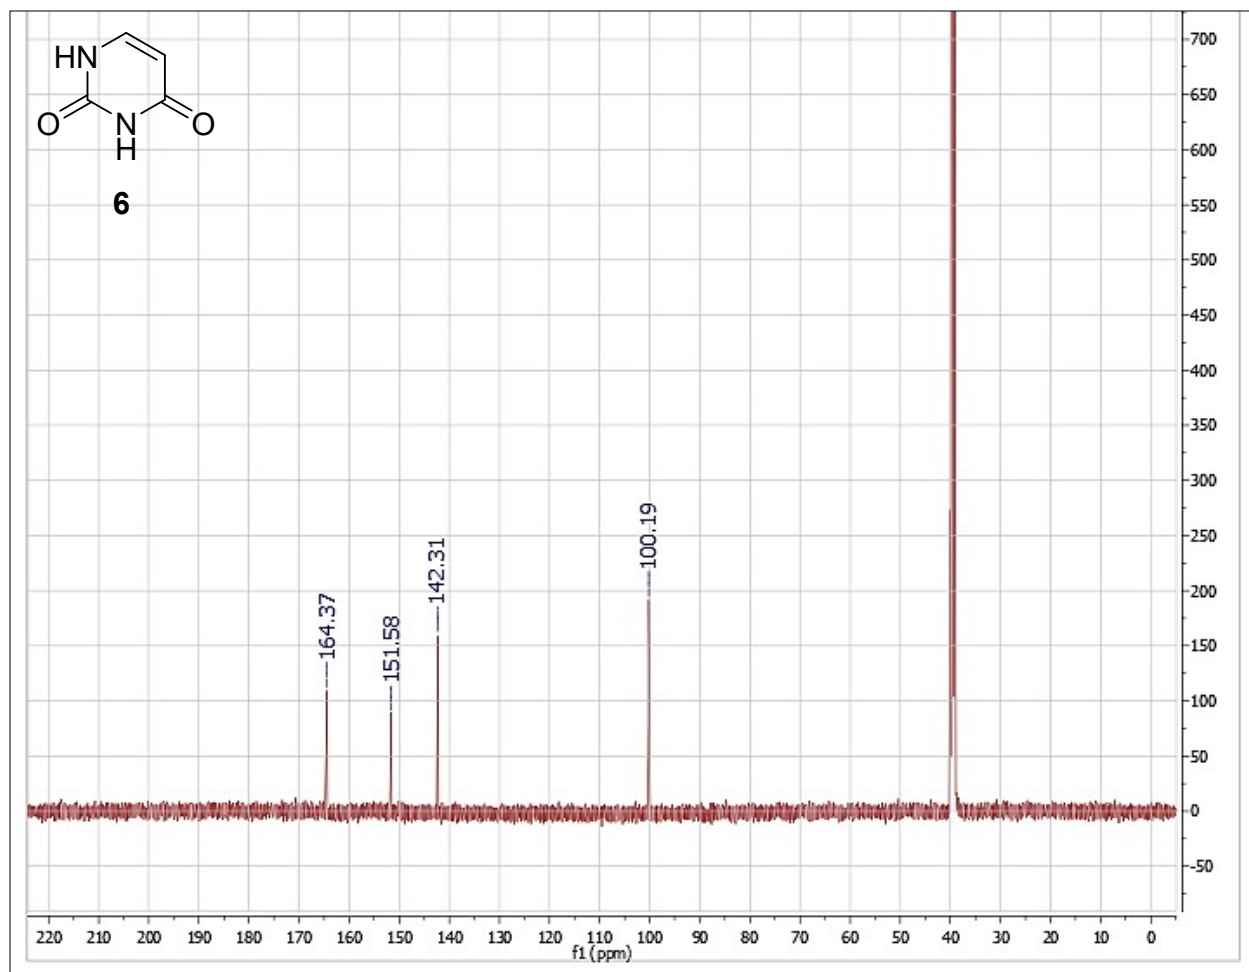

**Figure S21.**  $^{13}\text{C}$ -NMR spectrum of compound 6 (125 MHz,  $\text{DMSO-}d_6$ ).

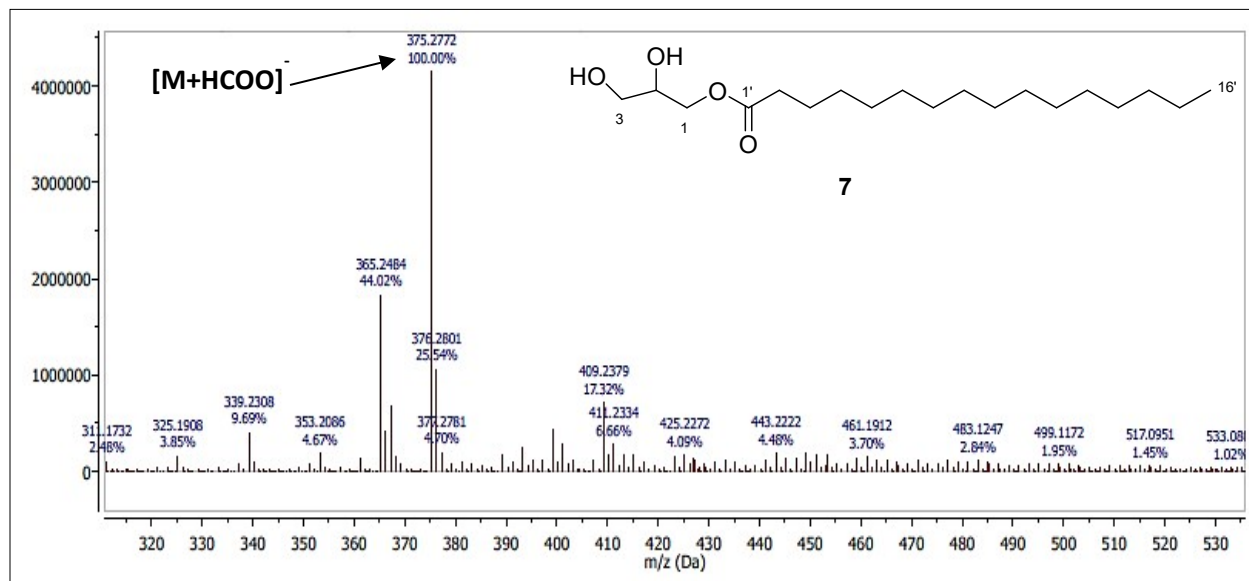

**Figure S22.** Negative HR-ESI-MS spectrum of compound 7.

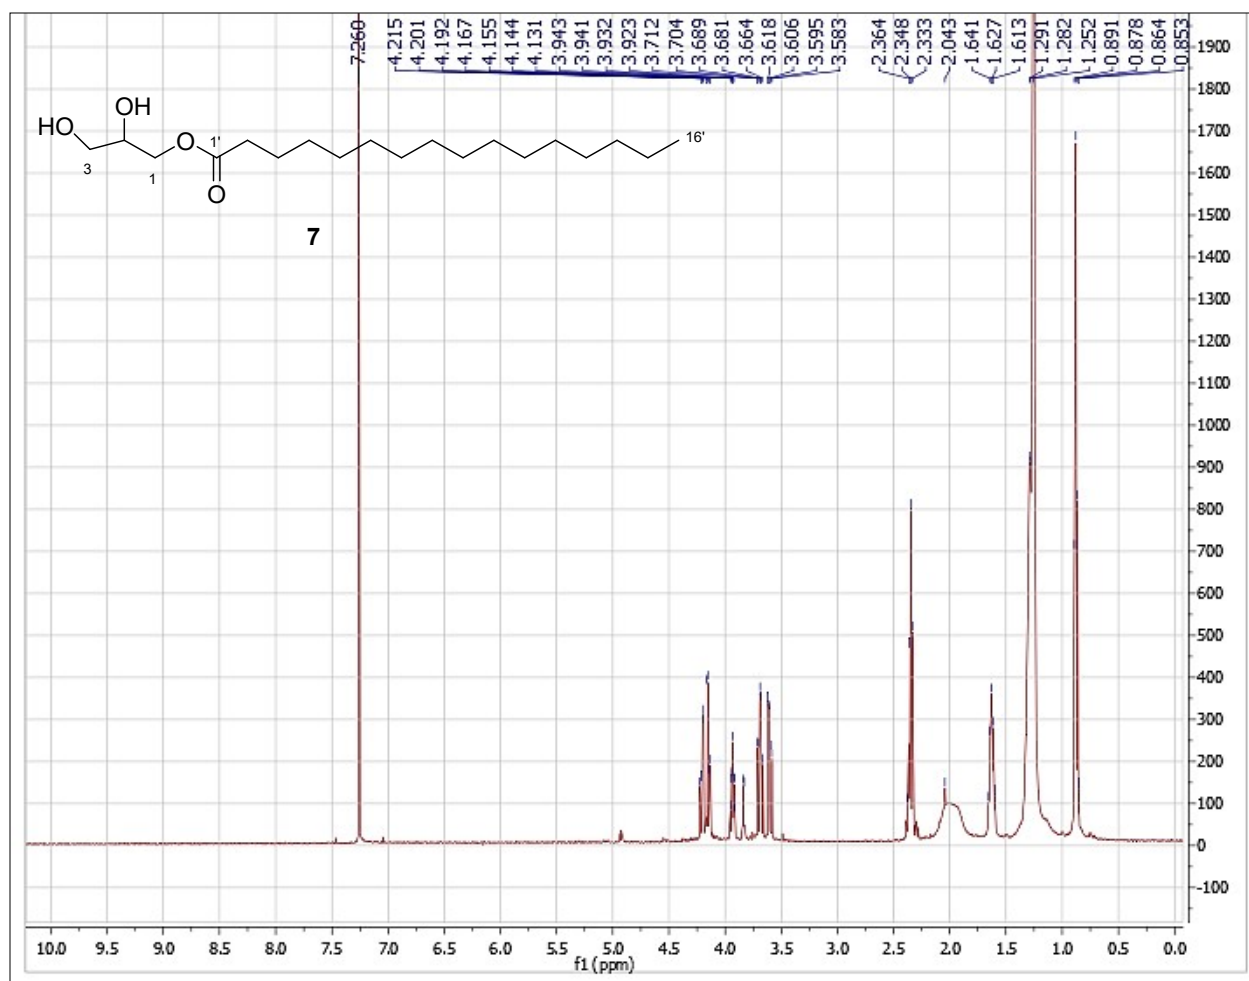

**Figure S23.** <sup>1</sup>H-NMR spectrum of compound 7 (500 MHz, CDCl<sub>3</sub>).

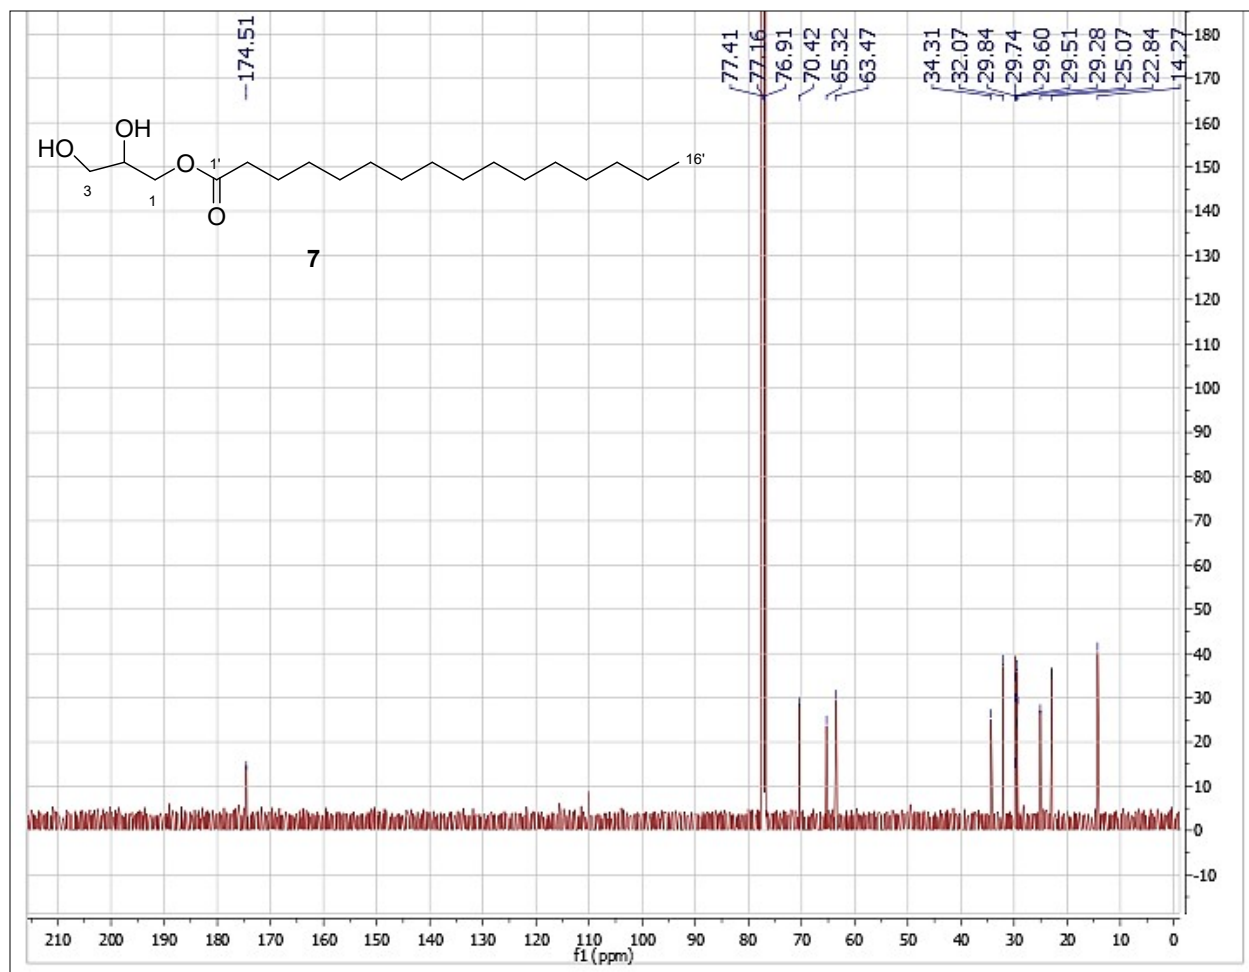

Figure S24.  $^{13}\text{C}$ -NMR spectrum of compound 7 (125 MHz,  $\text{CDCl}_3$ ).

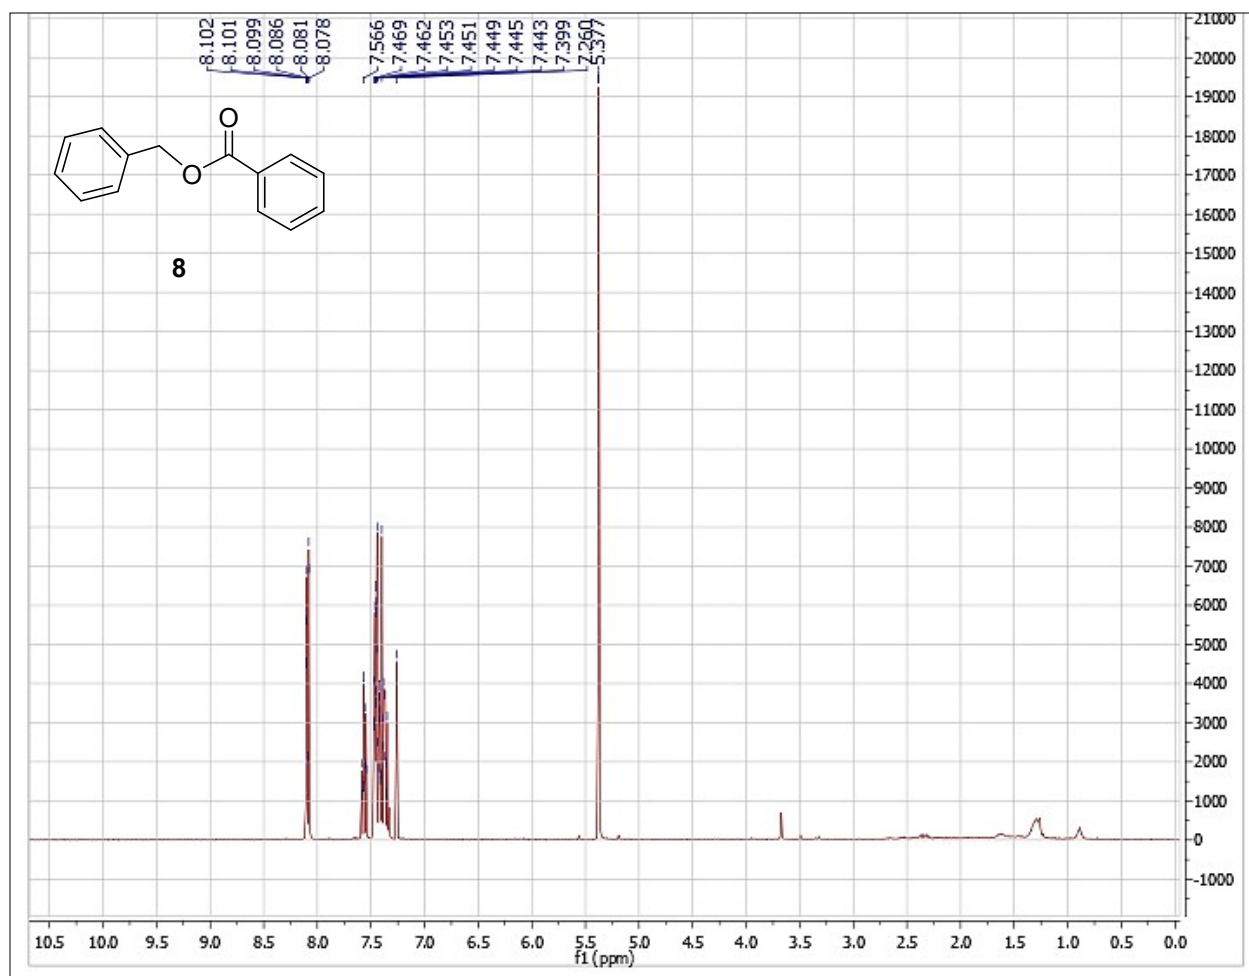

**Figure S25.** <sup>1</sup>H-NMR spectrum of compound **8** (400 MHz, CDCl<sub>3</sub>).



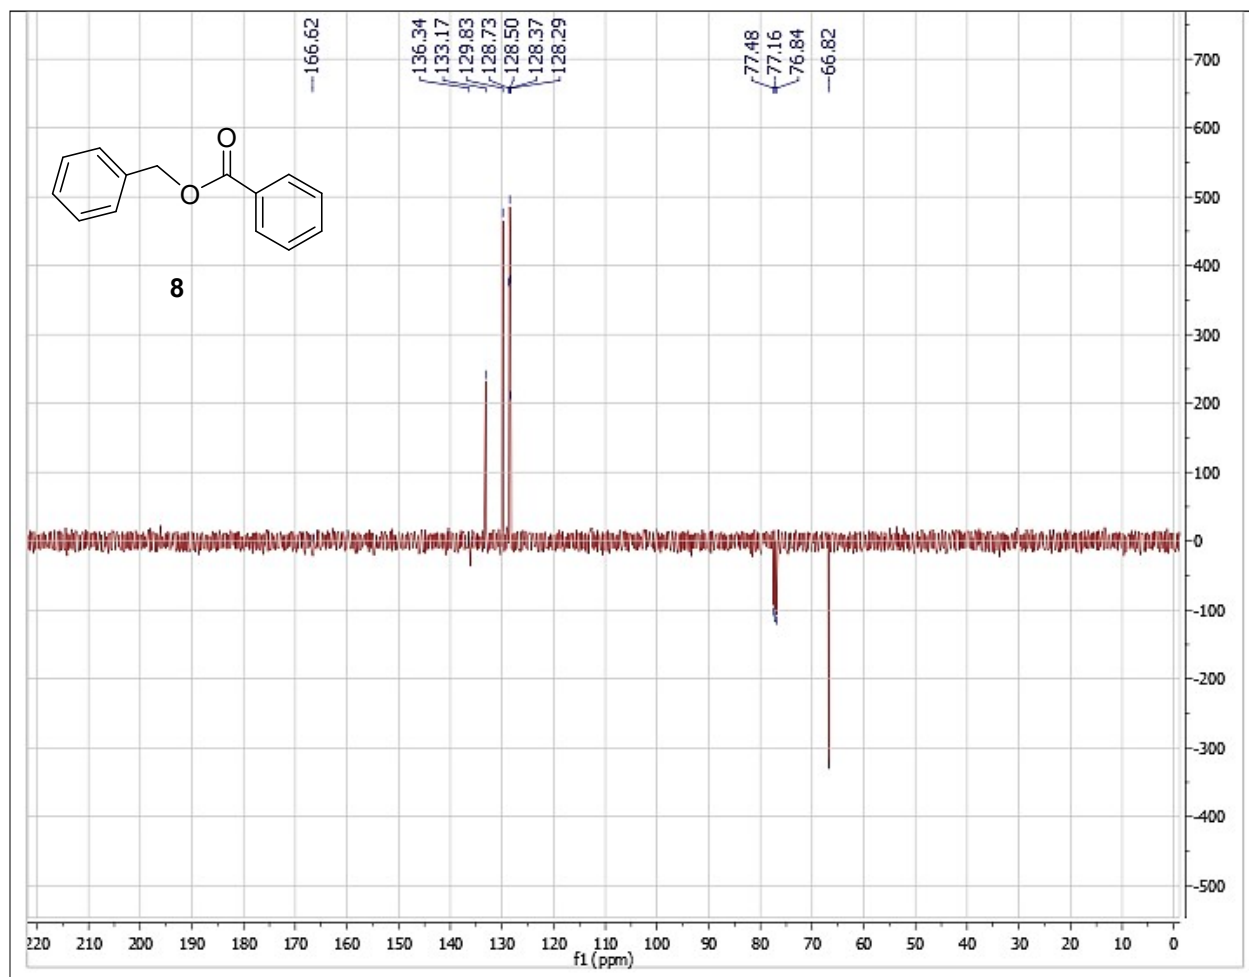

Figure S26. DEPT-Q spectrum of compound 8 (100 MHz,  $\text{CDCl}_3$ ).

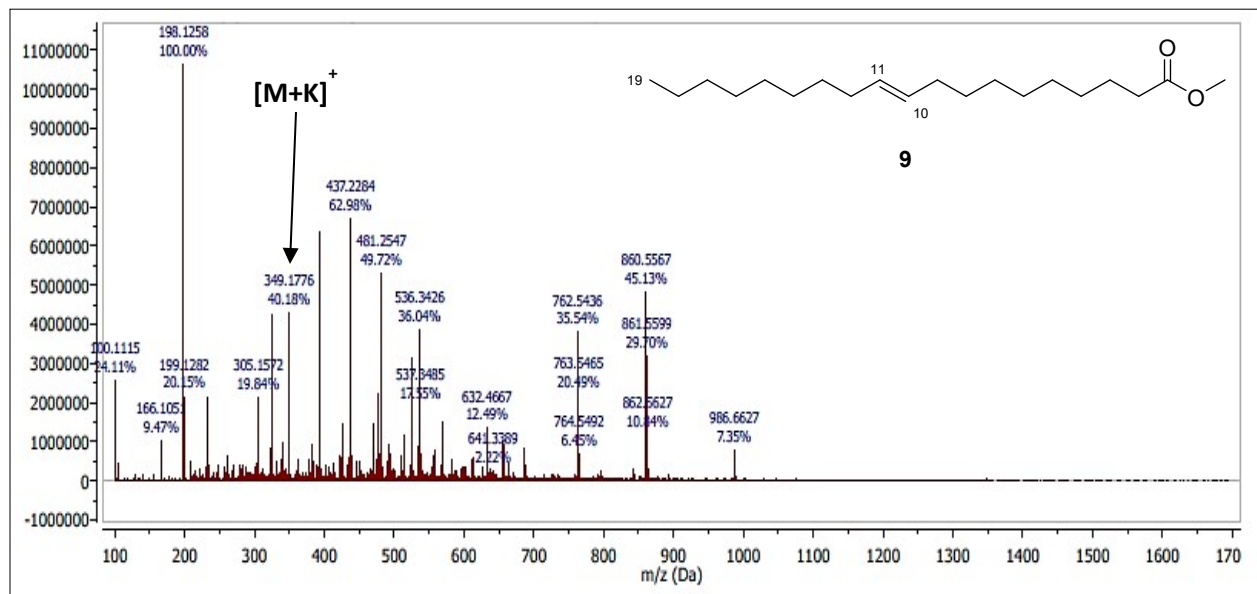

Figure S27. Positive HR-ESI-MS spectrum of compound **9**.

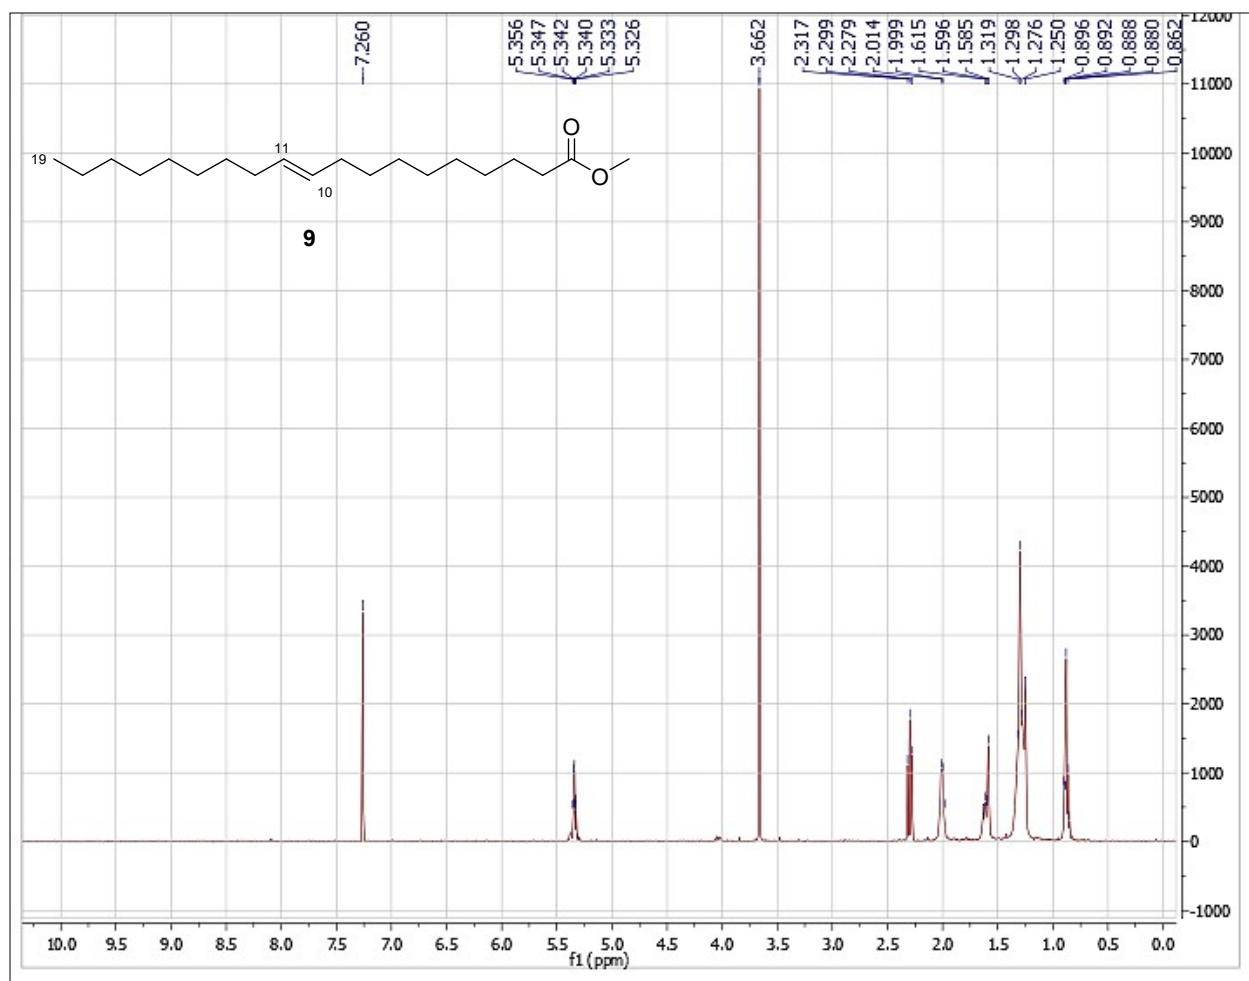

**Figure S28.**  $^1\text{H-NMR}$  spectrum of compound **9** (400 MHz,  $\text{CDCl}_3$ ).

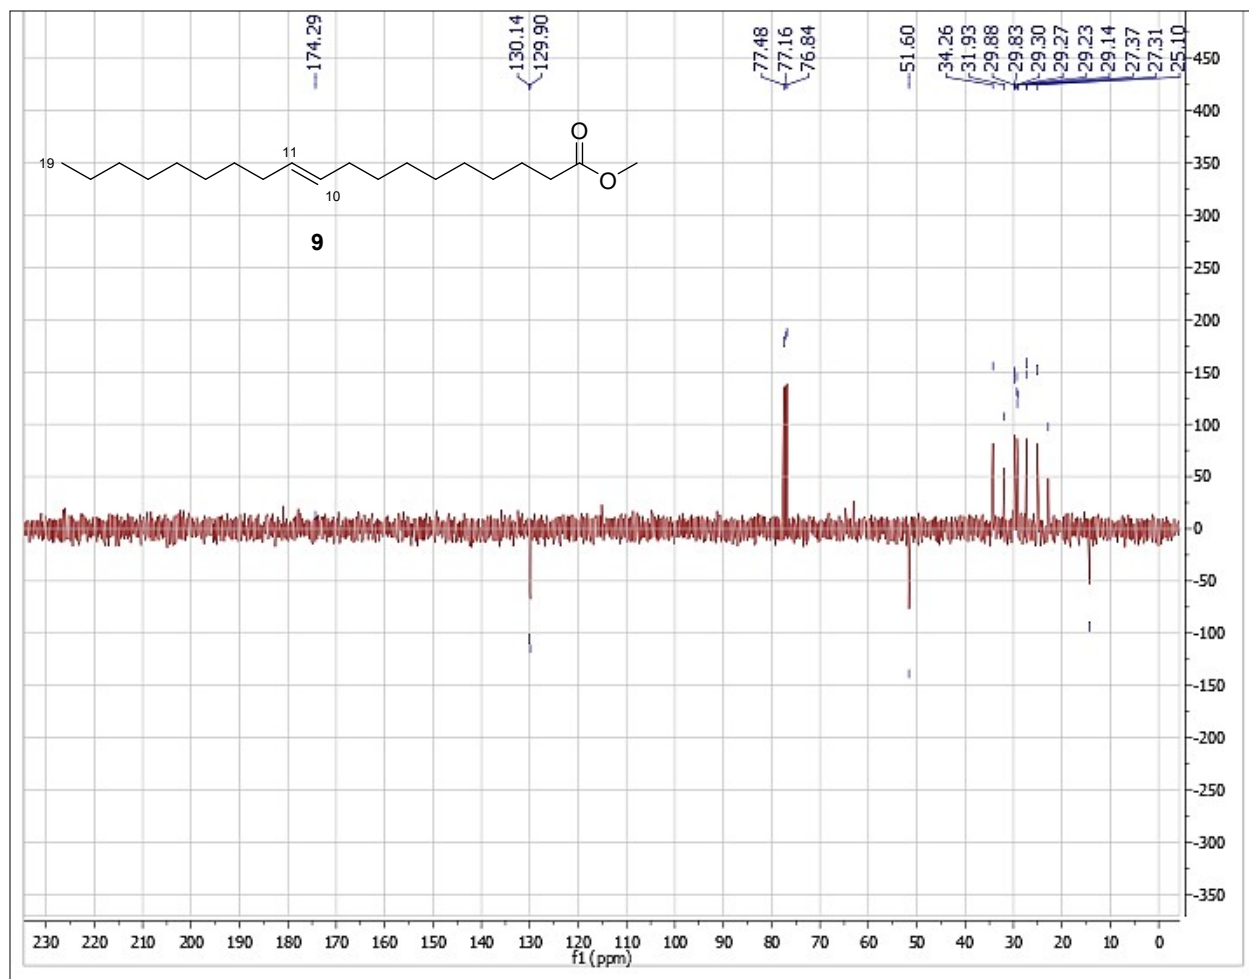

Figure S29. DEPT-Q spectrum of compound 9 (100 MHz,  $\text{CDCl}_3$ ).

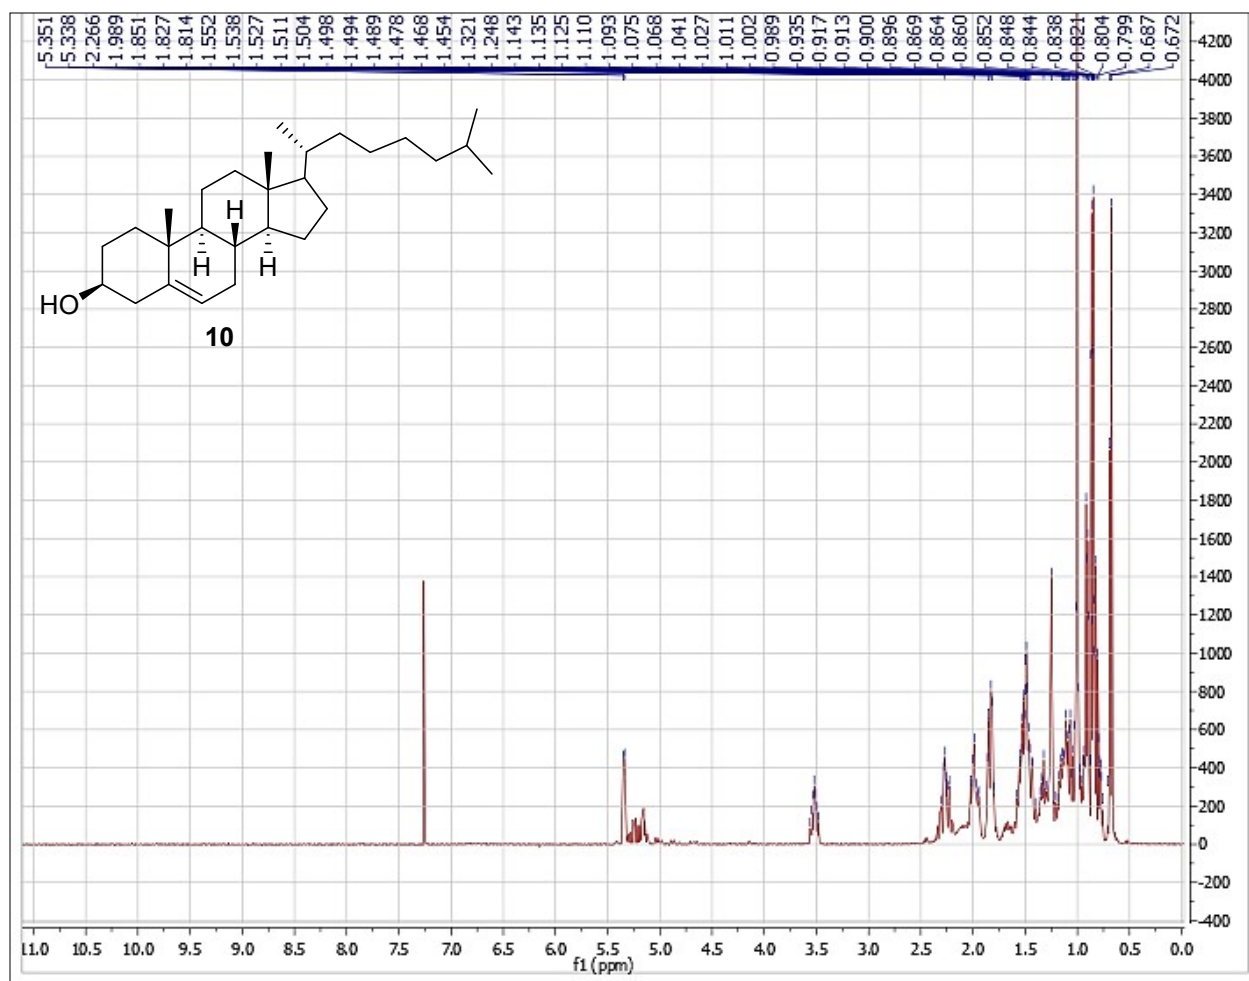

**Figure S30.** <sup>1</sup>H-NMR spectrum of compound **10** (400 MHz, CDCl<sub>3</sub>).

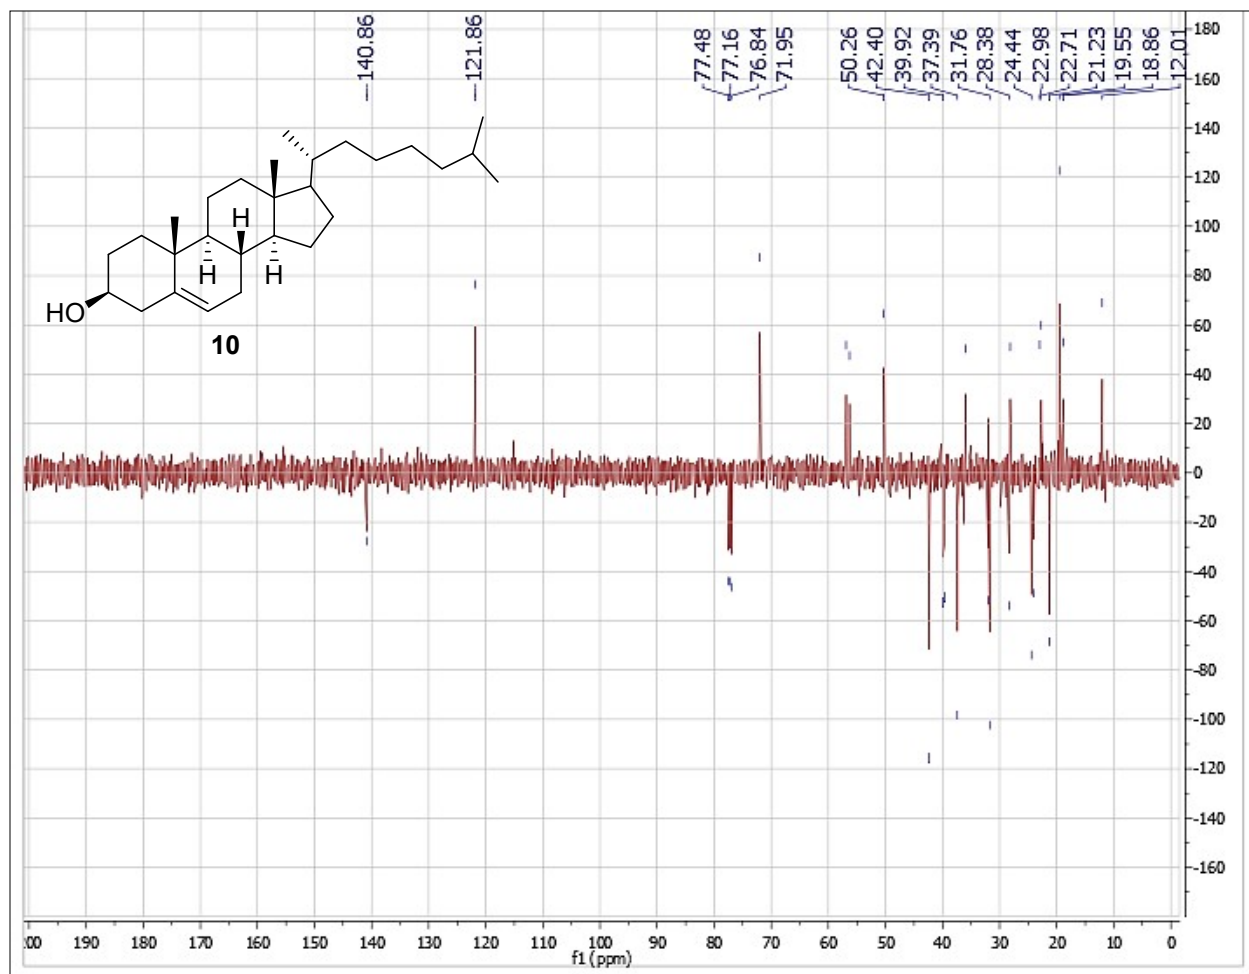

**Figure S31.** DEPT-Q spectrum of compound **10** (100 MHz,  $\text{CDCl}_3$ ).

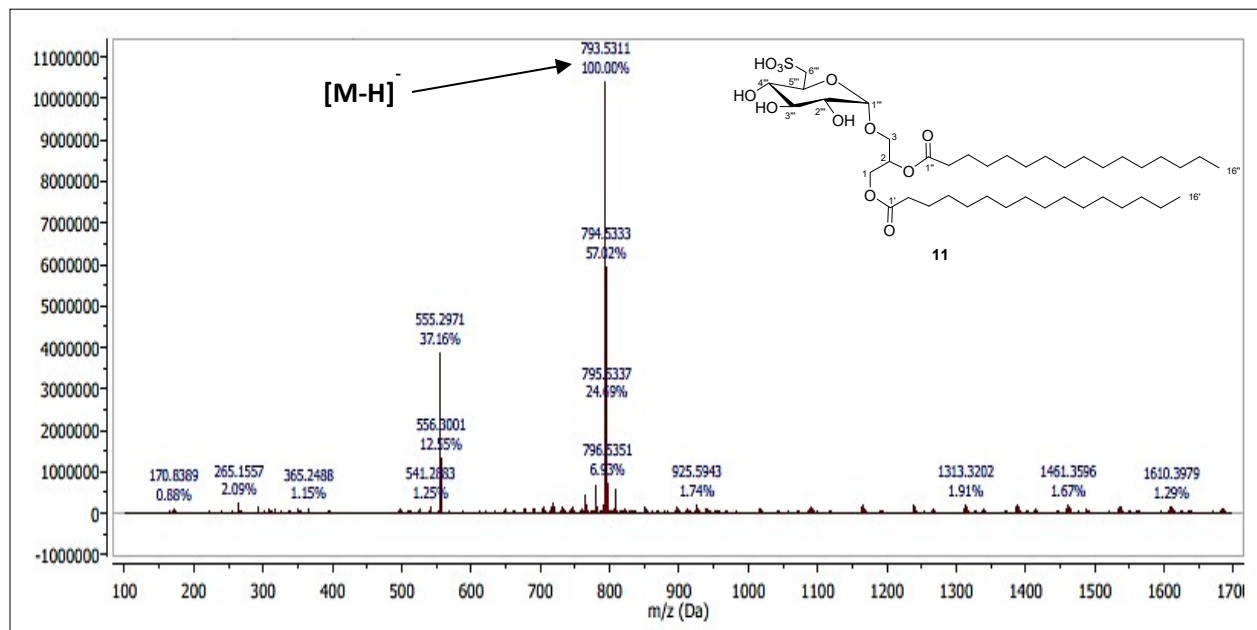

Figure S32. Negative HR-ESI-MS spectrum of compound **11**.

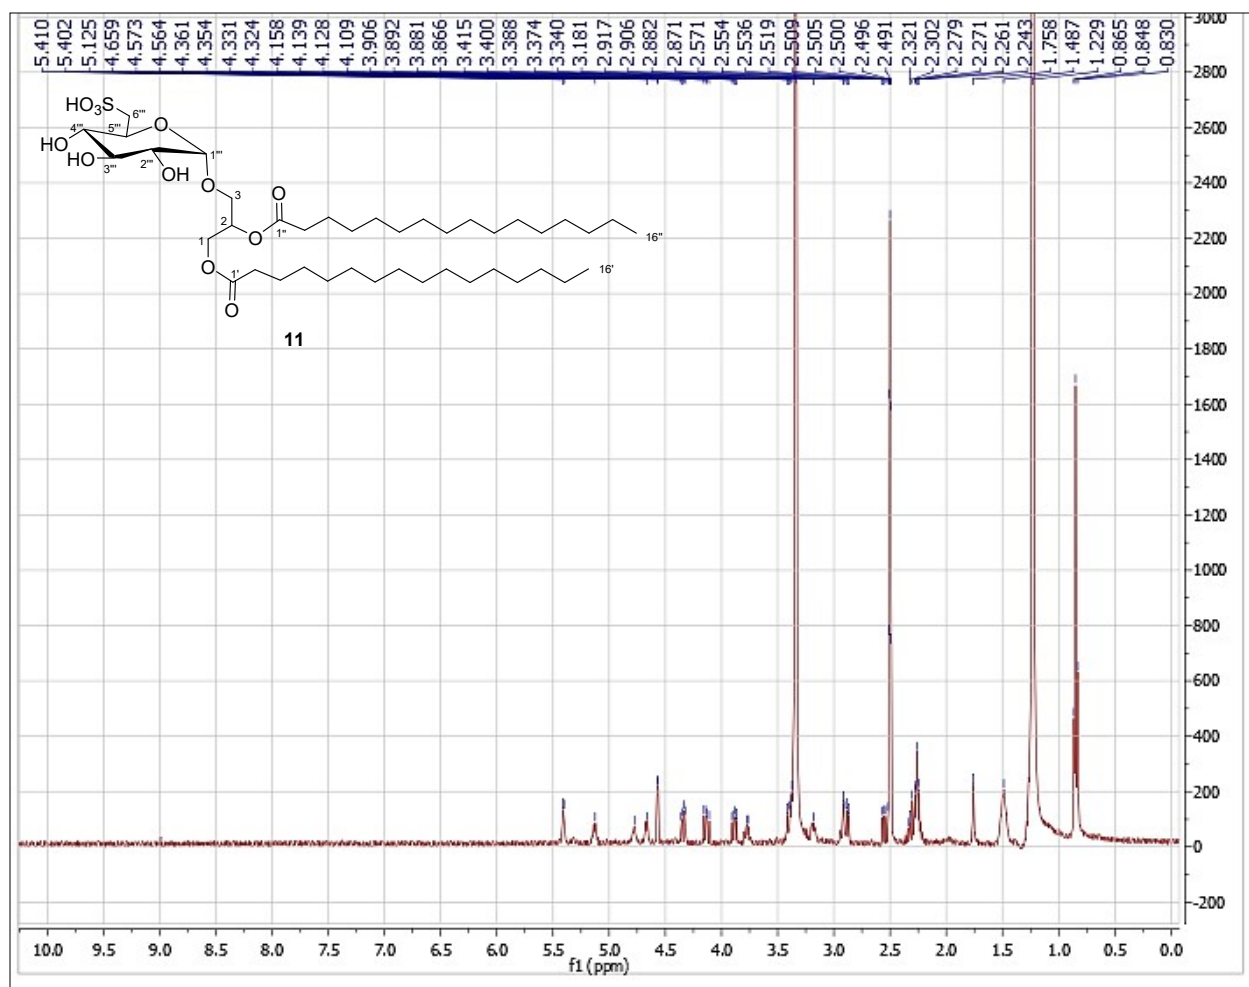

**Figure S33.**  $^1\text{H-NMR}$  spectrum of compound **11** (400 MHz,  $\text{DMSO-}d_6$ ).



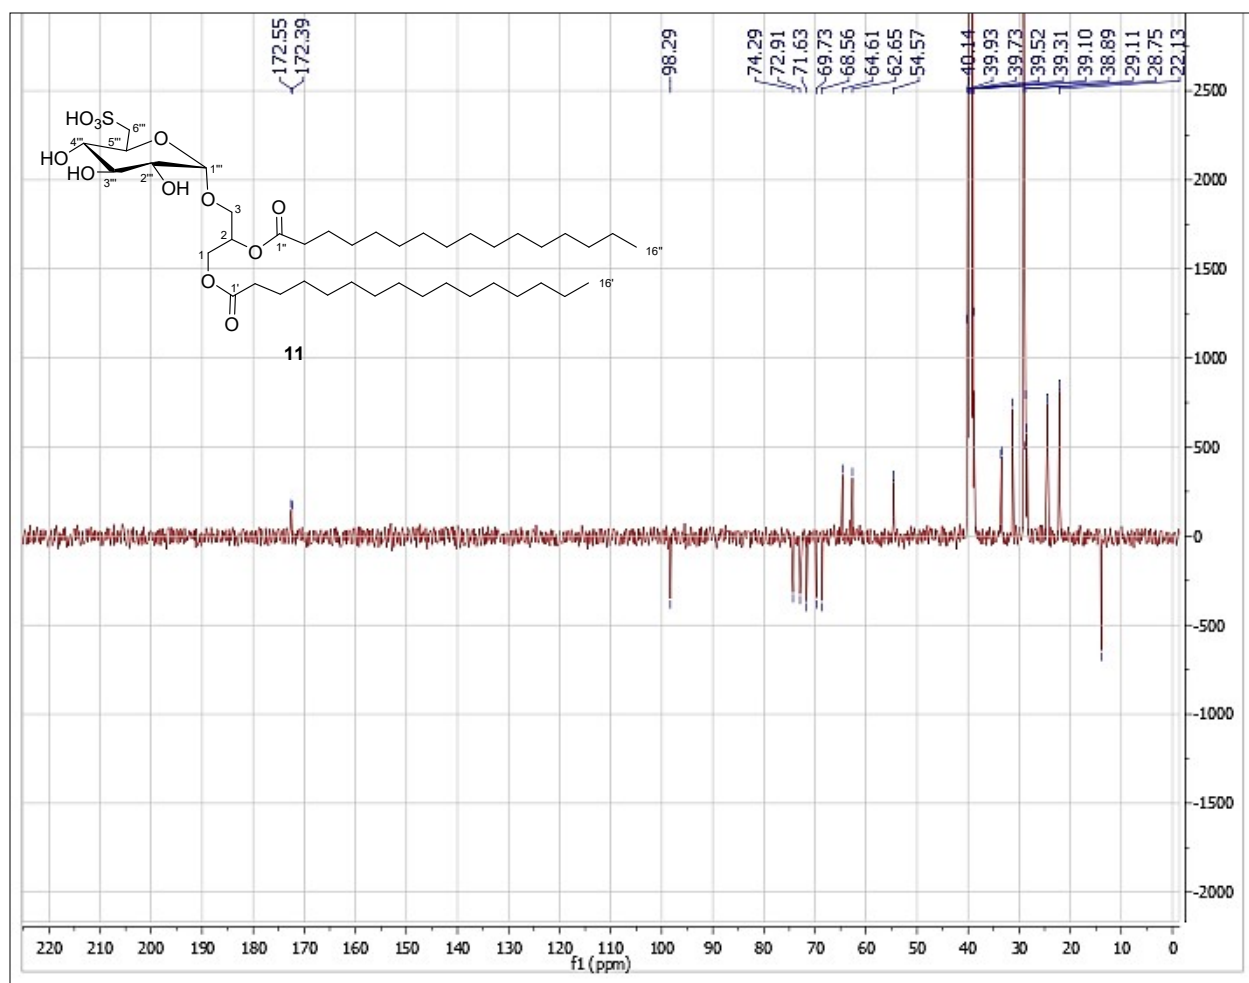

**Figure S34.** DEPT-Q spectrum of compound **11** (100 MHz, DMSO- $d_6$ ).

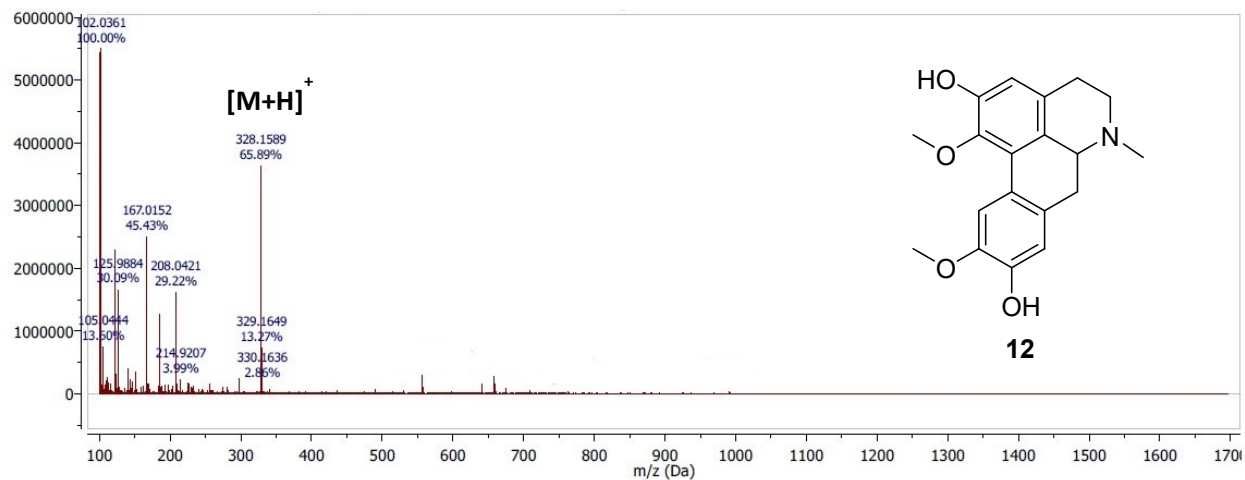

Figure S35. Positive HR-ESI-MS spectrum of compound **12**.

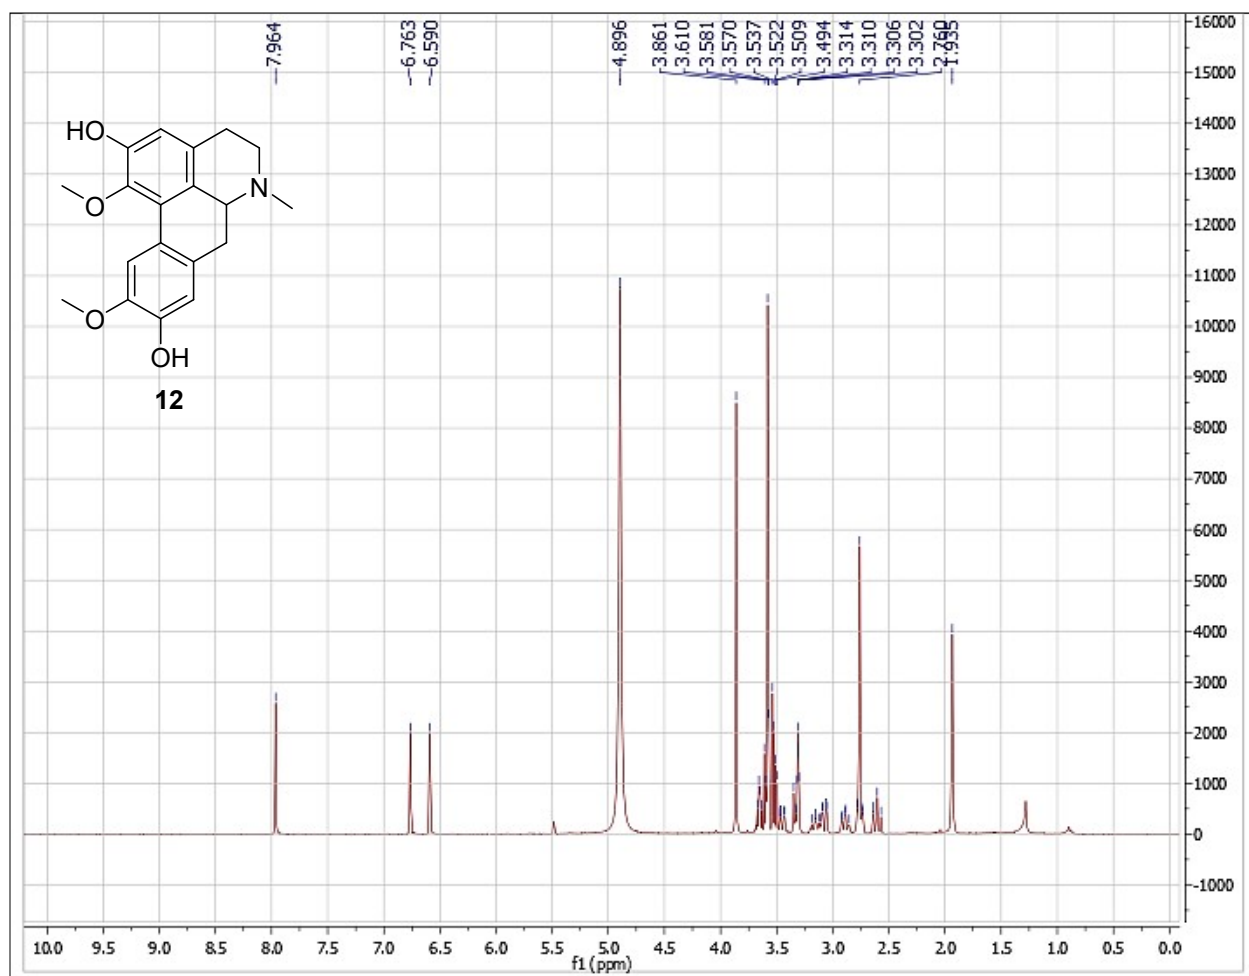

**Figure S36.**  $^1\text{H-NMR}$  spectrum of compound **12** (400 MHz,  $\text{CD}_3\text{OD}$ ).

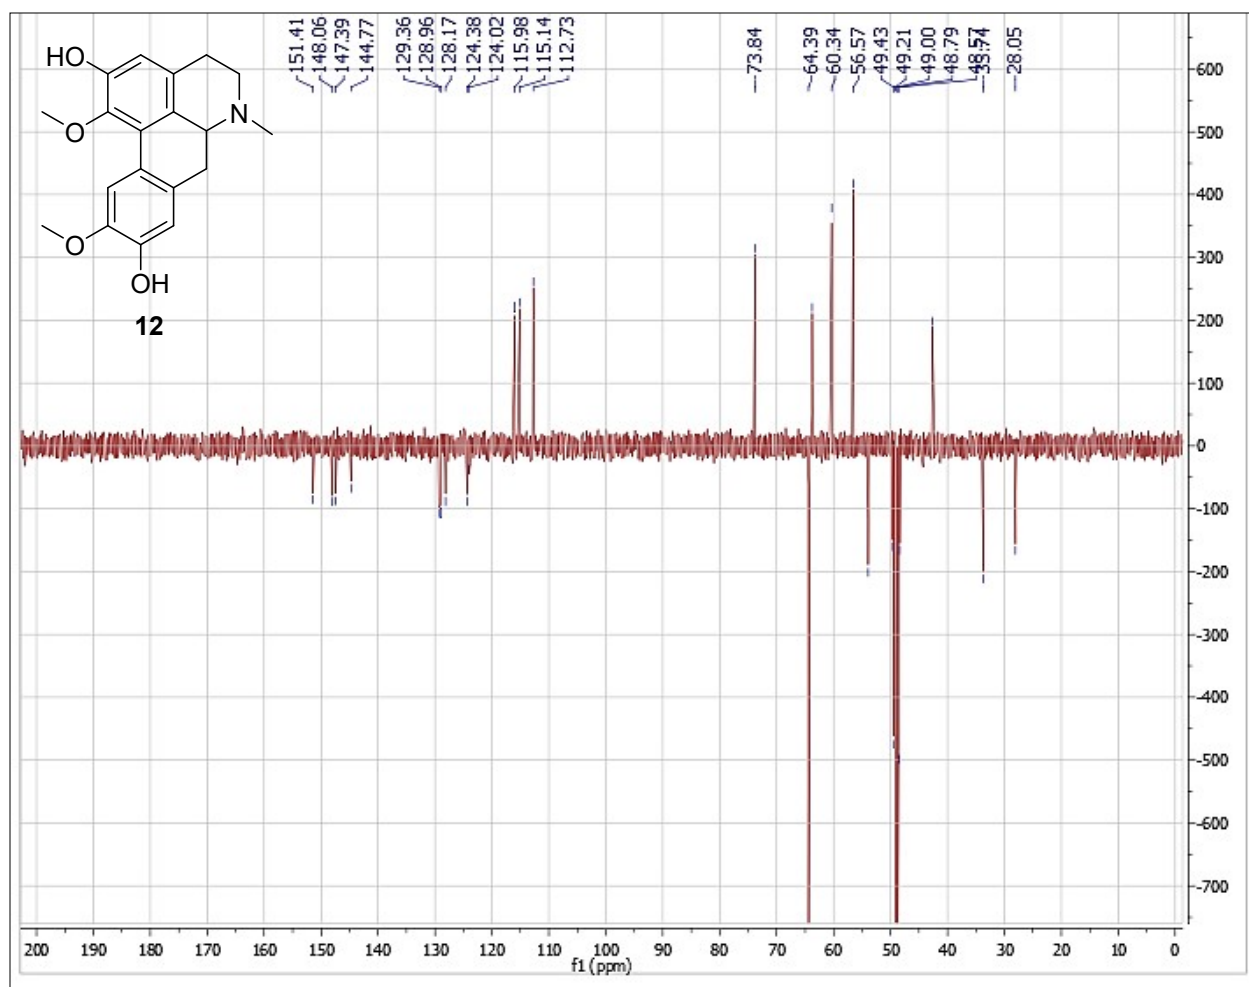

**Figure S37.** DEPT-Q spectrum of compound **12** (100 MHz, CD<sub>3</sub>OD).

**Table S1.** Chemical quantum descriptors and their equations (1-8).

| <b>DFT parameter</b>          | <b>Equations</b>                              |
|-------------------------------|-----------------------------------------------|
| Energy gap ( $\Delta E$ )     | $\Delta E = E_{LUMO} - E_{HOMO}$              |
| Ionization potential (I)      | $I = -E_{HOMO}$                               |
| Hardness ( $\eta$ )           | $\eta = (I - A) / 2$                          |
| Softness ( $\sigma$ )         | $\sigma = 1/2\eta$                            |
| Chemical potential ( $\mu$ )  | $\mu = -\chi \cong (E_{HOMO} + E_{LUMO}) / 2$ |
| Electronegativity ( $\chi$ )  | $\chi = (I + A)/2$                            |
| Electron Affinity (A)         | $A = -E_{LUMO}$                               |
| Electrophilicity ( $\omega$ ) | $\omega = \mu^2/2\eta$                        |

**Table S2.** Calculated quantum-chemical parameters of the compounds (**1**, **2** and **11**) using the B3LYP/6-311++G (2d,2p) method.

| <b>Compunds</b> | <b>ELUMO</b>    | <b>EHOMO</b>   | <b><math>\Delta E</math></b> | <b>A</b>       | <b>I</b>      | <b>X</b>        | <b><math>\eta</math></b> | <b>s</b>        | <b><math>\omega</math></b> | <b><math>\Delta N</math> max</b> | <b><math>\Delta N</math></b> |
|-----------------|-----------------|----------------|------------------------------|----------------|---------------|-----------------|--------------------------|-----------------|----------------------------|----------------------------------|------------------------------|
| <b>1</b>        | <b>-0.13963</b> | <b>-0.2043</b> | <b>0.06467</b>               | <b>0.13963</b> | <b>0.2043</b> | <b>0.171965</b> | <b>0.032335</b>          | <b>30.92624</b> | <b>0.91455</b>             | <b>2.659116</b>                  | <b>105.5827</b>              |
| <b>2</b>        | <b>-0.15414</b> | <b>-0.3063</b> | <b>0.15216</b>               | <b>0.15414</b> | <b>0.3063</b> | <b>0.23022</b>  | <b>0.07608</b>           | <b>13.14406</b> | <b>0.696652</b>            | <b>1.513013</b>                  | <b>44.49119</b>              |
| <b>12</b>       | <b>-0.12027</b> | <b>-0.275</b>  | <b>0.15473</b>               | <b>0.12027</b> | <b>0.275</b>  | <b>0.197635</b> | <b>0.077365</b>          | <b>12.92574</b> | <b>0.504874</b>            | <b>1.277289</b>                  | <b>43.96281</b>              |
